# Supplementary material for: New phenylcyclopropane-carbohydrazide furan derivatives with potent anticancer activity and EGFR inhibitory potential
Source: Royal Society of Chemistry journal article supplement (doi:10.1039/d5ra09654e), 2026-05-18
Supplement: d5ra09654e1.pdf [file d5ra09654e1.pdf]

## Supporting Information

### Cell Culture Conditions and MTT Assay

Human breast (MCF-7, MDA-MB-231), lung (A549) and liver (HepG2) cancer cell lines were cultured in Dulbecco's Modified Eagle medium (DMEM) under optimal conditions (5% CO<sub>2</sub> at 37 °C) and provided with growth supplements (10% fetal bovine serum) and standard antibiotics (100 µg/mL penicillin and 100 µg/mL streptomycin). The *in vitro* cytotoxicity of GA was determined using a standard 3-(4,5-dimethylthiazol-2-yl)-2,5-diphenyltetrazolium bromide (MTT) assay. In brief, the cell lines were harvested using trypsin, pooled, and plated at a density of 1 x 10<sup>5</sup> cells/ml cells/well containing 10% FBS and 1% antibiotic solution for 24 h at 37 °C. After being washed using sterile PBS, the cells were treated with different concentrations of GA dissolved in serum-free DMEM and incubated under the abovementioned optimal conditions under 5% CO<sub>2</sub> for 24 h. After 24 h, the cells were incubated with MTT (20 µL of 5 mg/ml) for 2–4 h and observed for the formation of purple precipitates. Later, the medium with MTT was aspirated and washed with 1 x PBS (200 µl). 100 µL of DMSO was added at this point and the plate was shaken for 5 min. Later, the absorbance was read at 570 nm using a microplate reader (Thermo Fisher Scientific, USA). All these experiments were conducted in triplicate. Subsequently, the percentage of cell viability was determined and the IC<sub>50</sub> value was calculated using GraphPad Prism 6.0 software (USA). All chemicals used in the study were of analytical grade.

Supporting spectral information [Figure S1-S60]

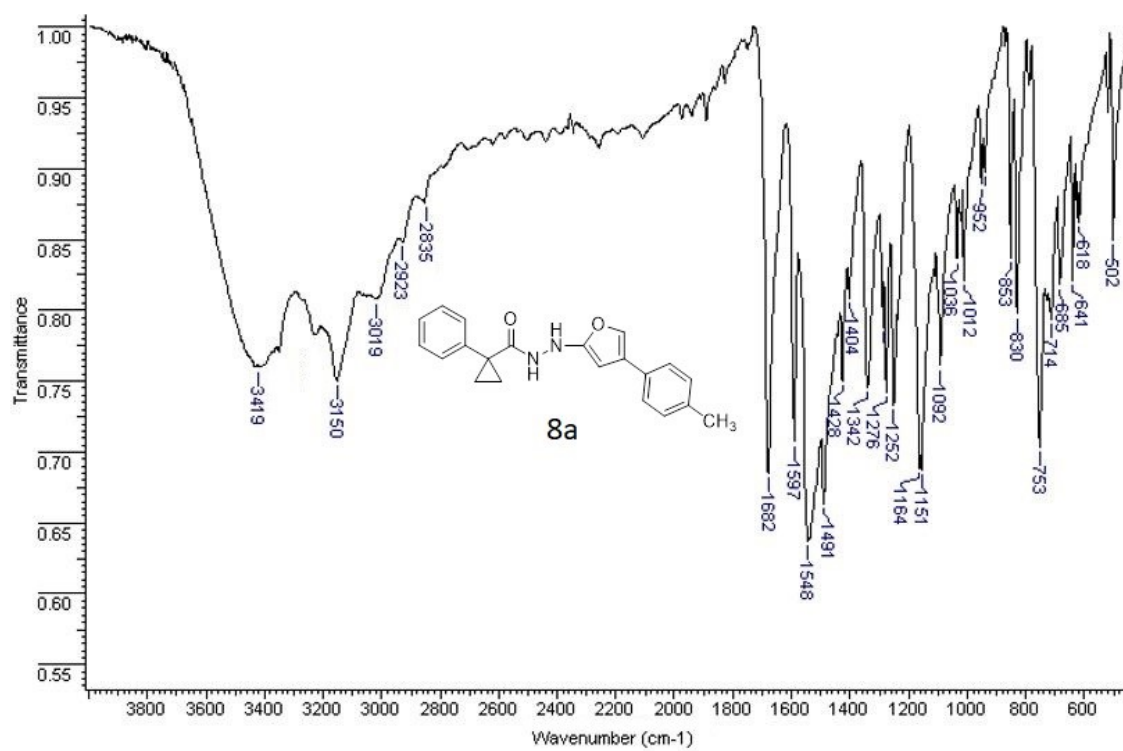

Fig

ure S1. IR spectrum of **8a**

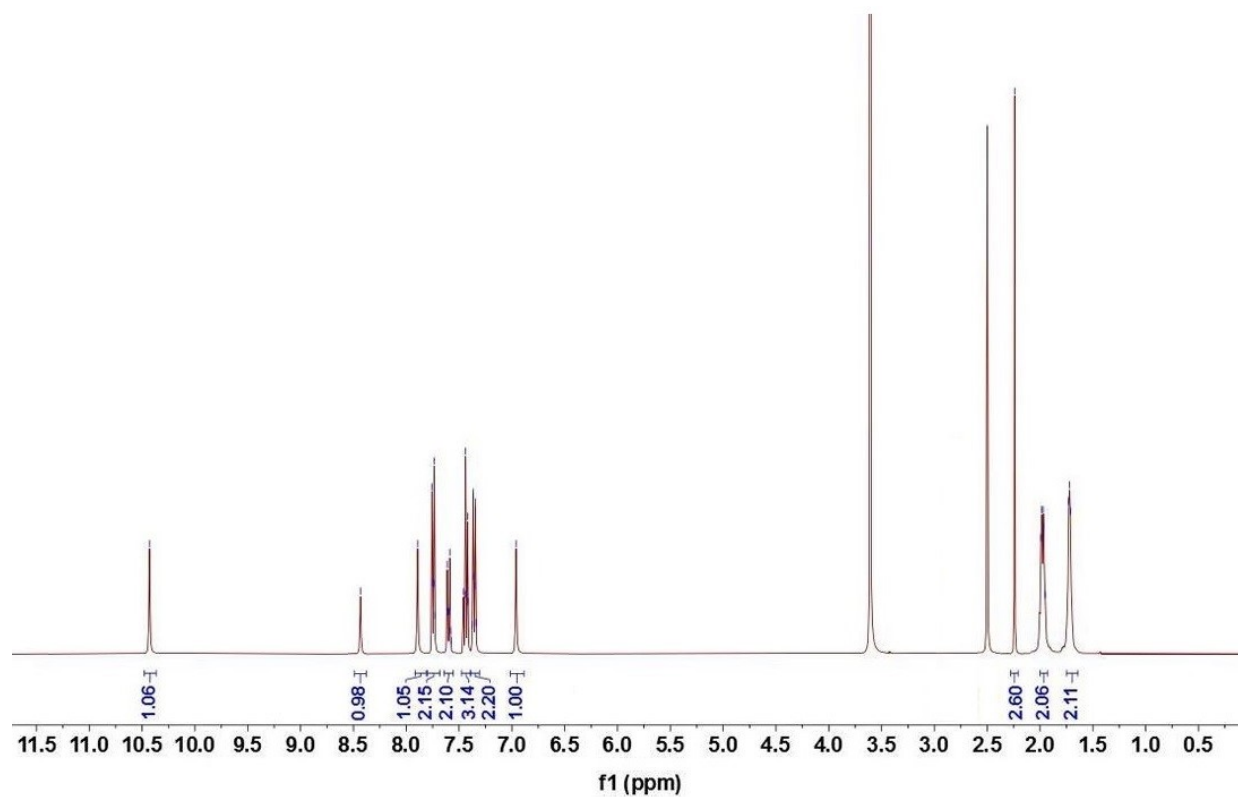

Figure S2. <sup>1</sup>H NMR spectrum of **8a**

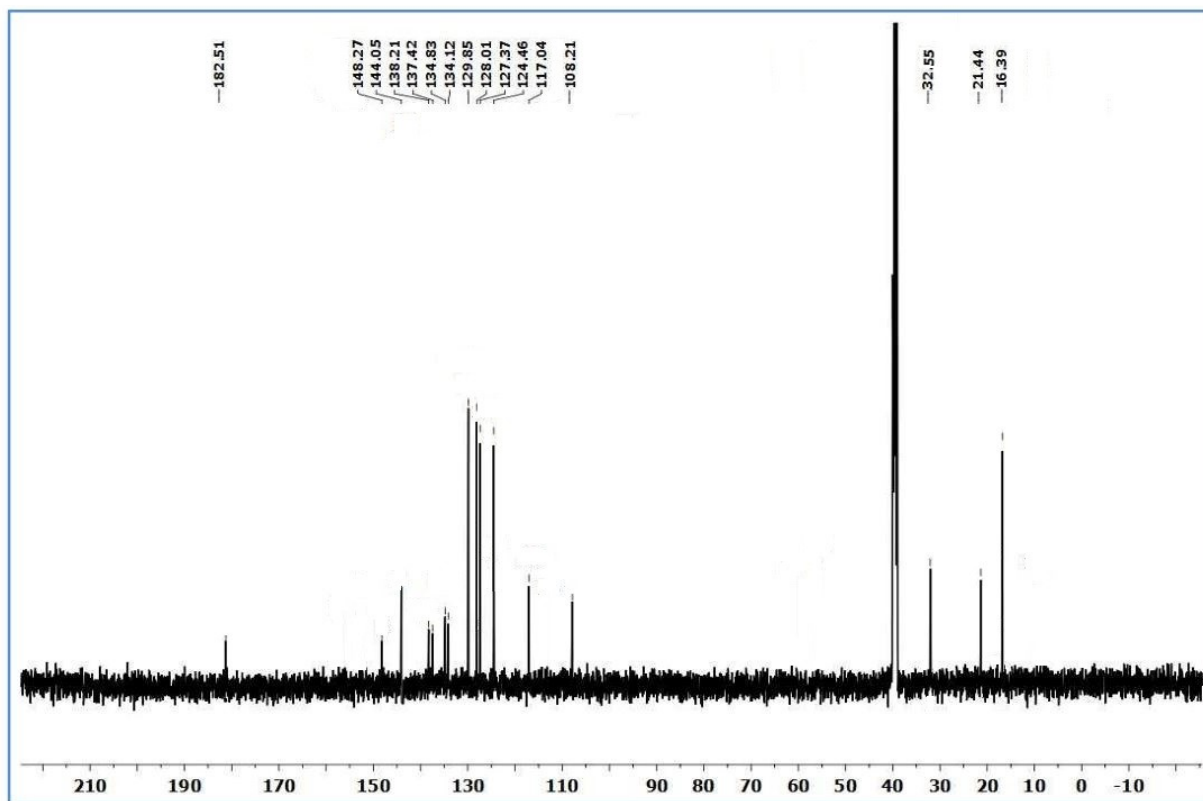

Figure S3.  $^{13}\text{C}$  NMR spectrum of **8a**

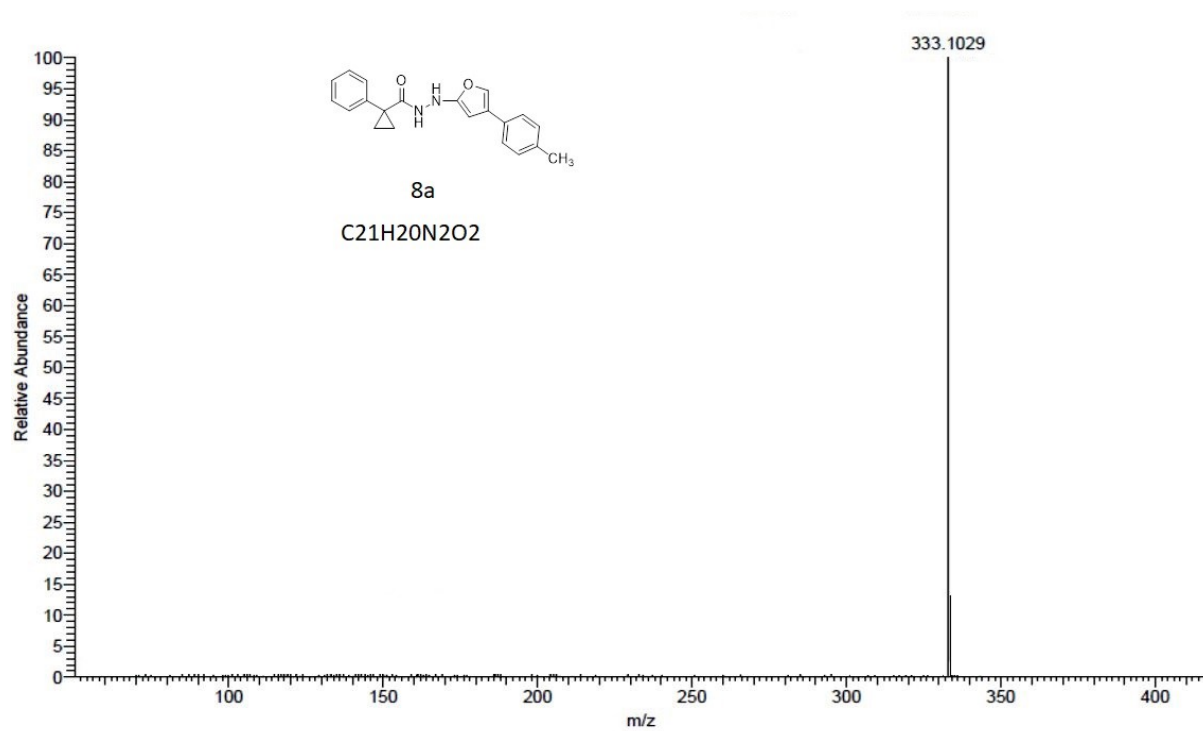

Figure S4. HRMS spectrum of **8a**

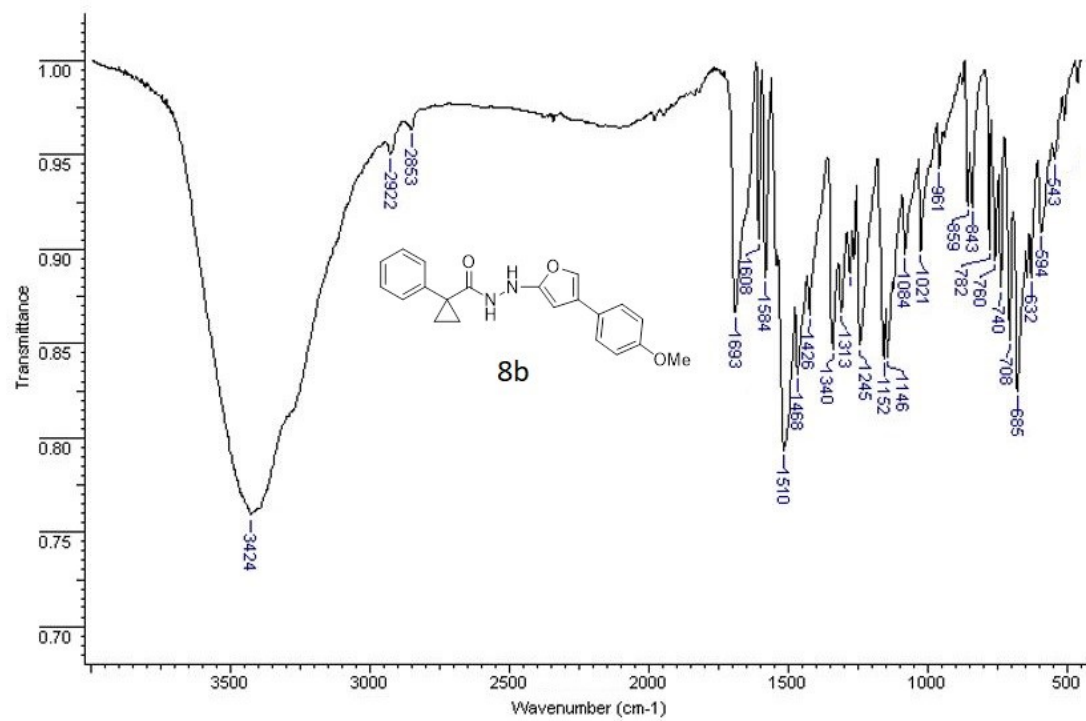

**Figure S5.** IR spectrum of **8b**

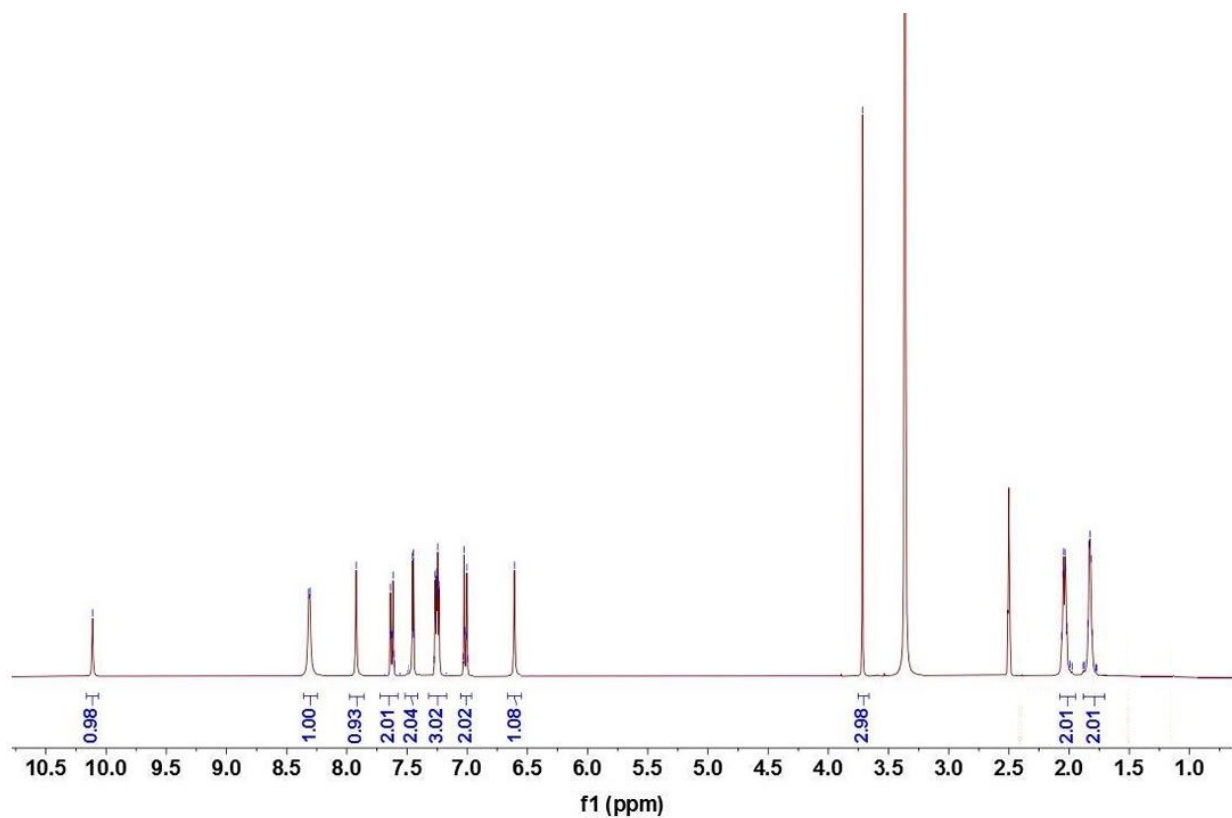

**Figure S6.** <sup>1</sup>H NMR spectrum of **8b**

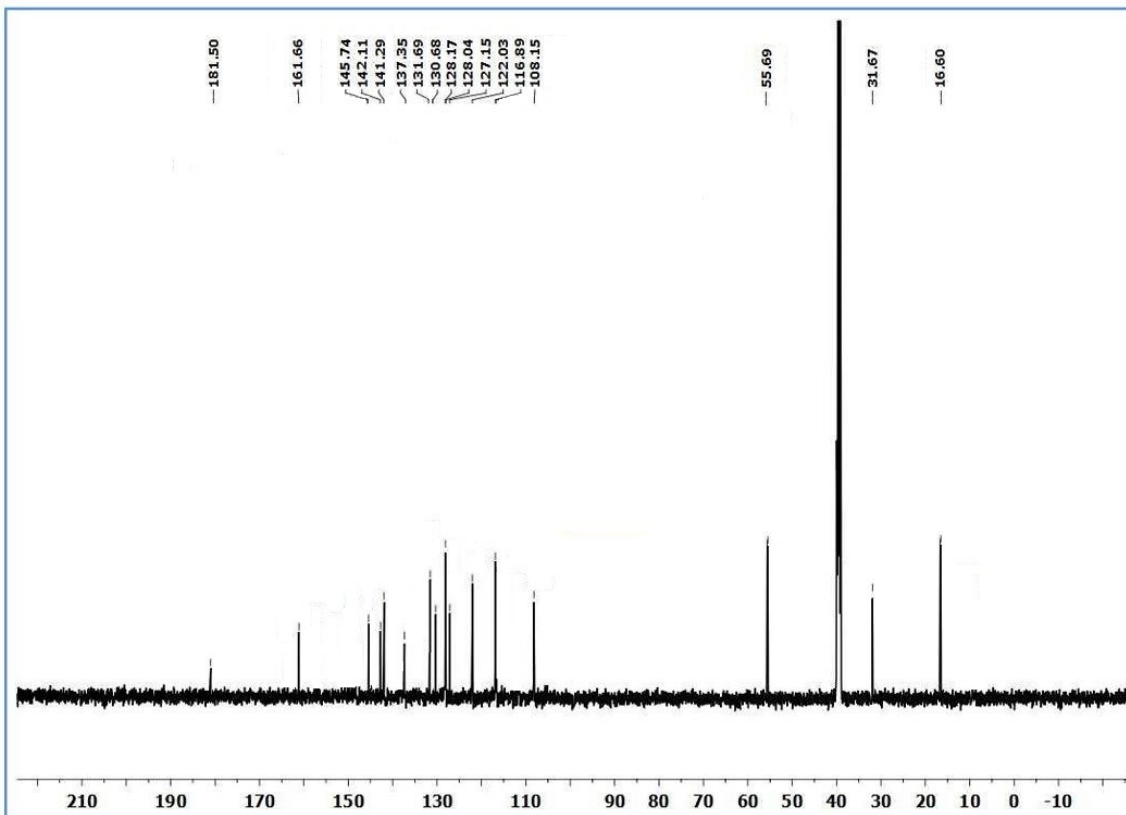

Figure S7.  $^{13}\text{C}$  NMR spectrum of **8b**

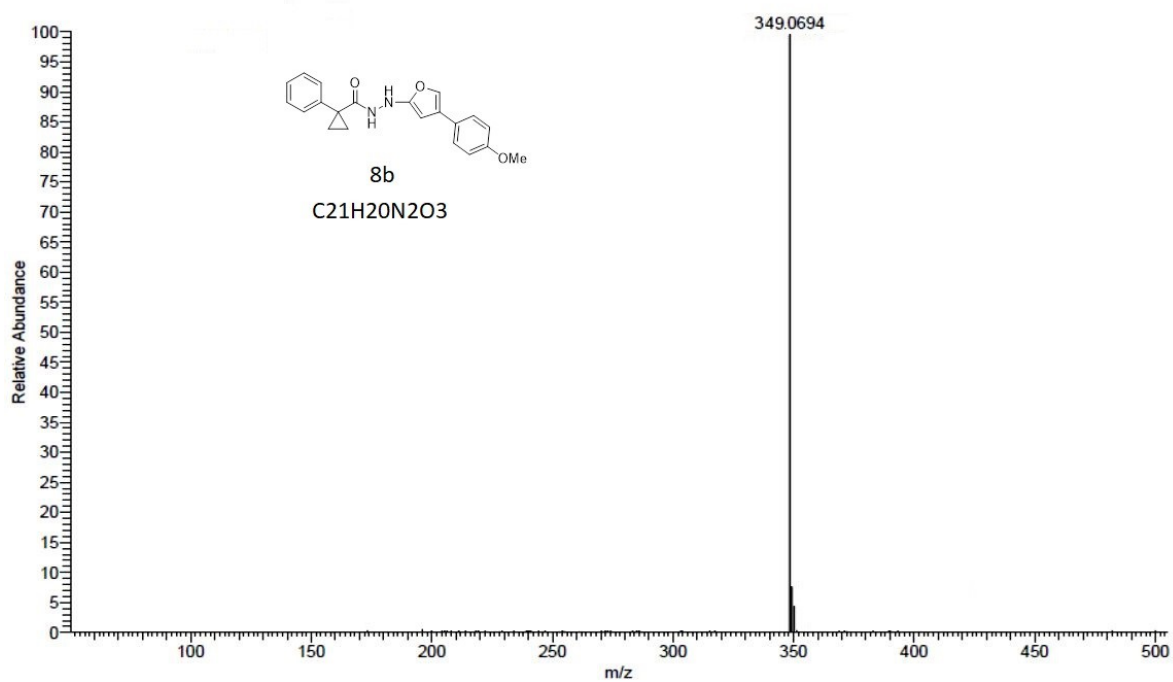

Figure S8. HRMS spectrum of **8b**

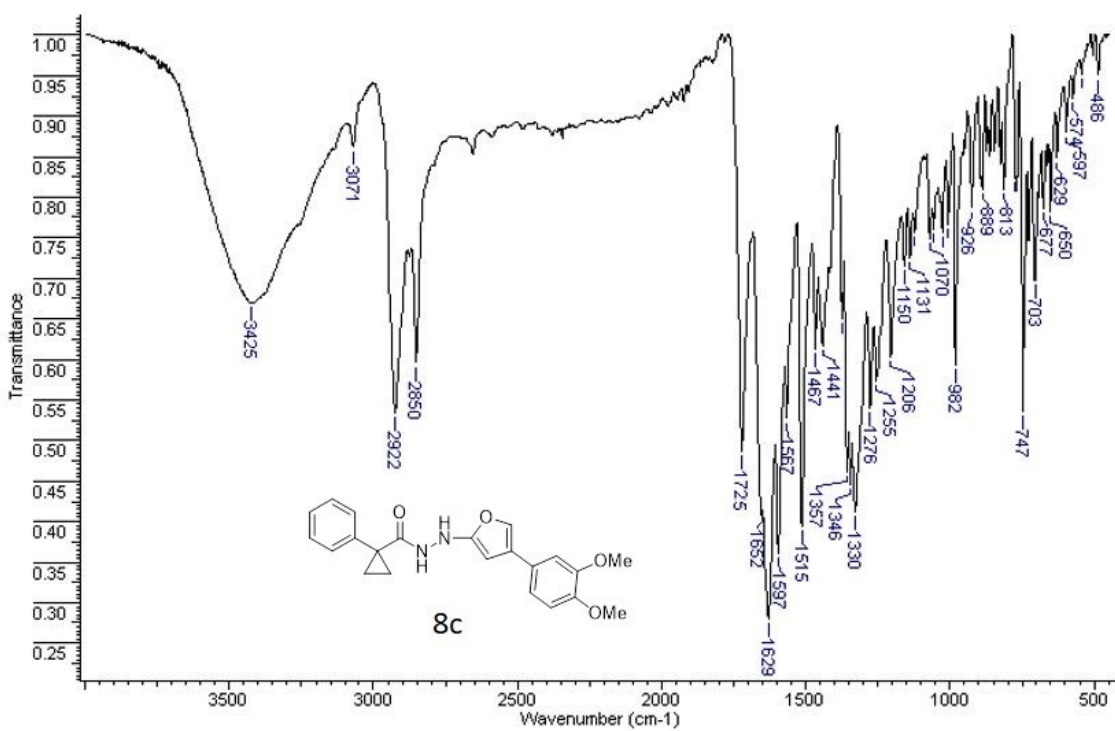

Figure S9. IR spectrum of 8c

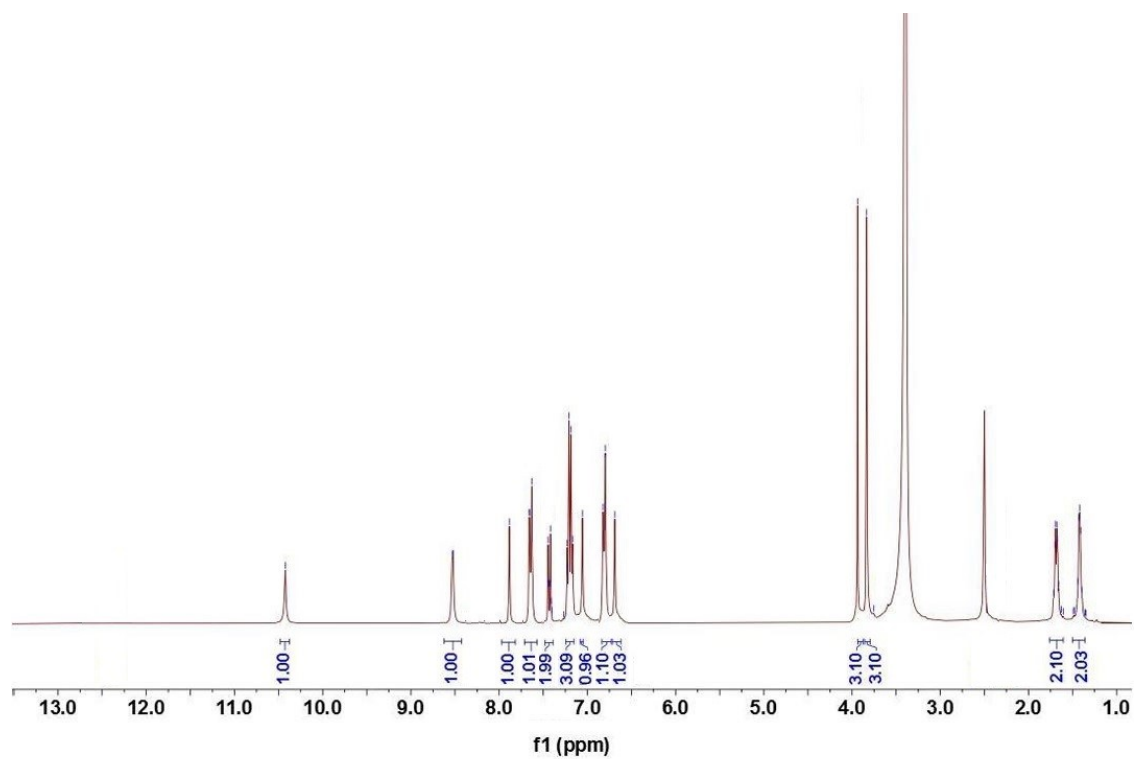

Figure S10.  $^1\text{H}$  NMR spectrum of **8c**

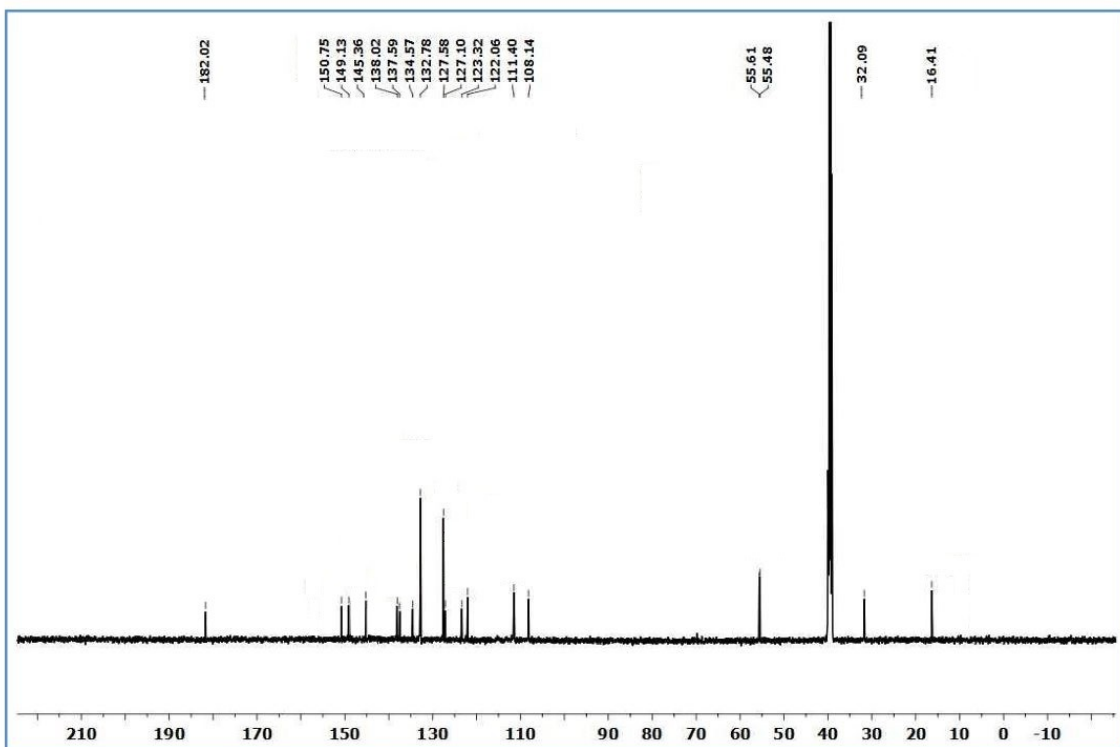

Figure S11.  $^{13}\text{C}$  NMR spectrum of **8c**

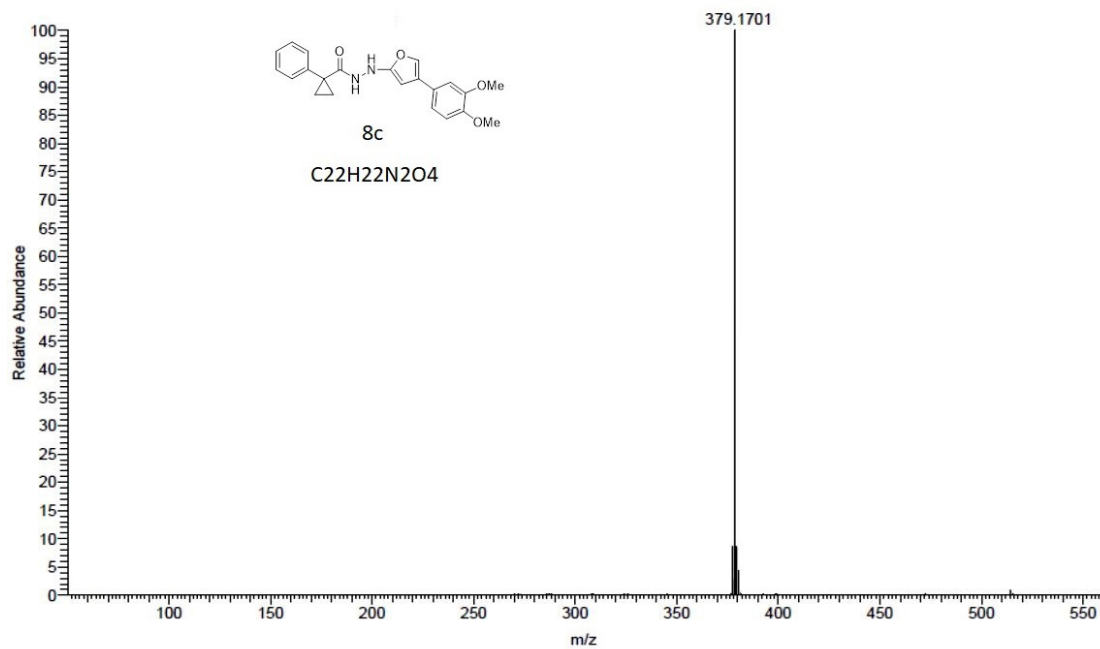

Figure S12. HRMS spectrum of **8c**

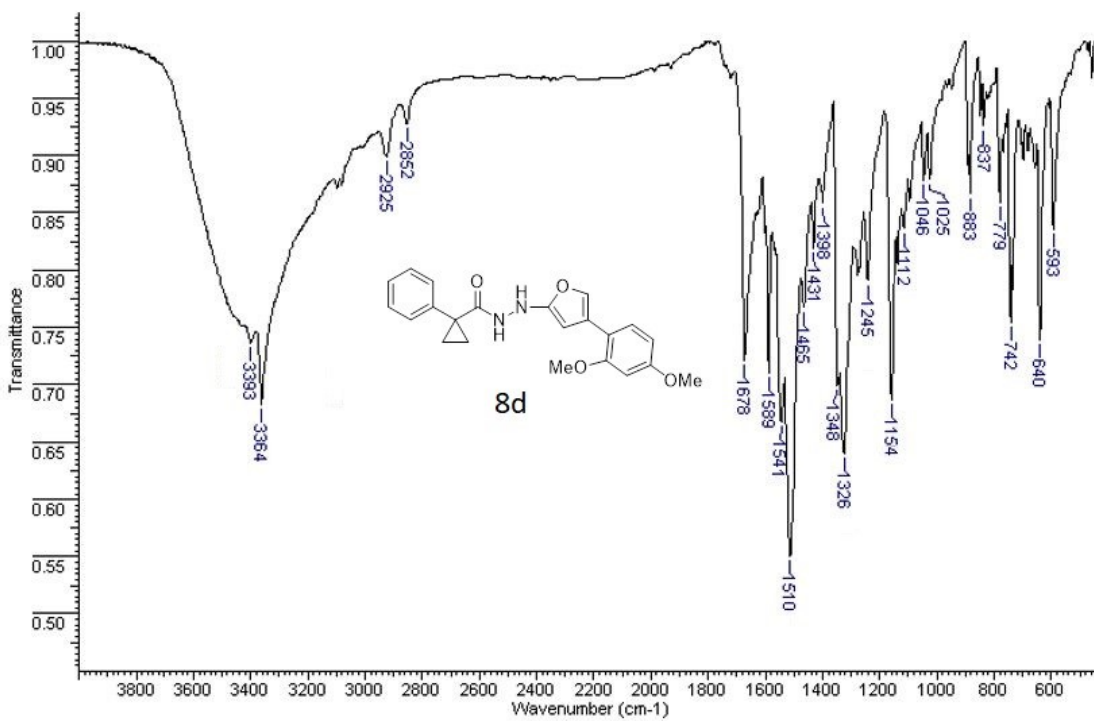

Figure S13. IR spectrum of **8d**

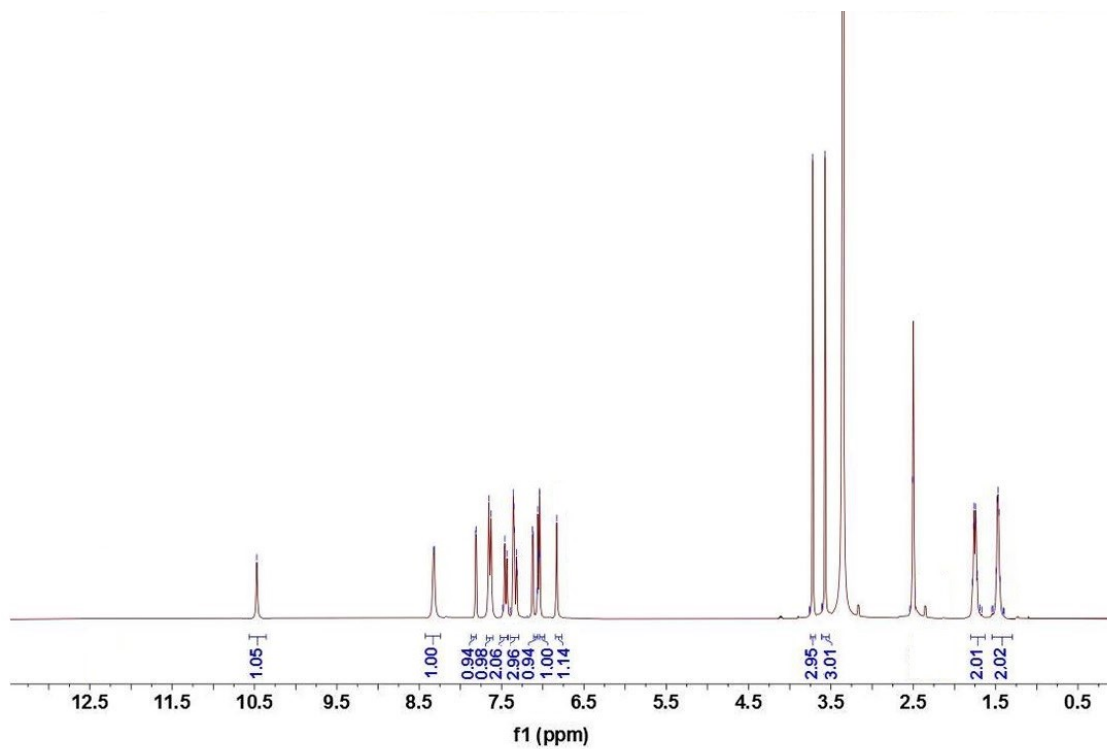

Figure S14. <sup>1</sup>H NMR spectrum of 8d

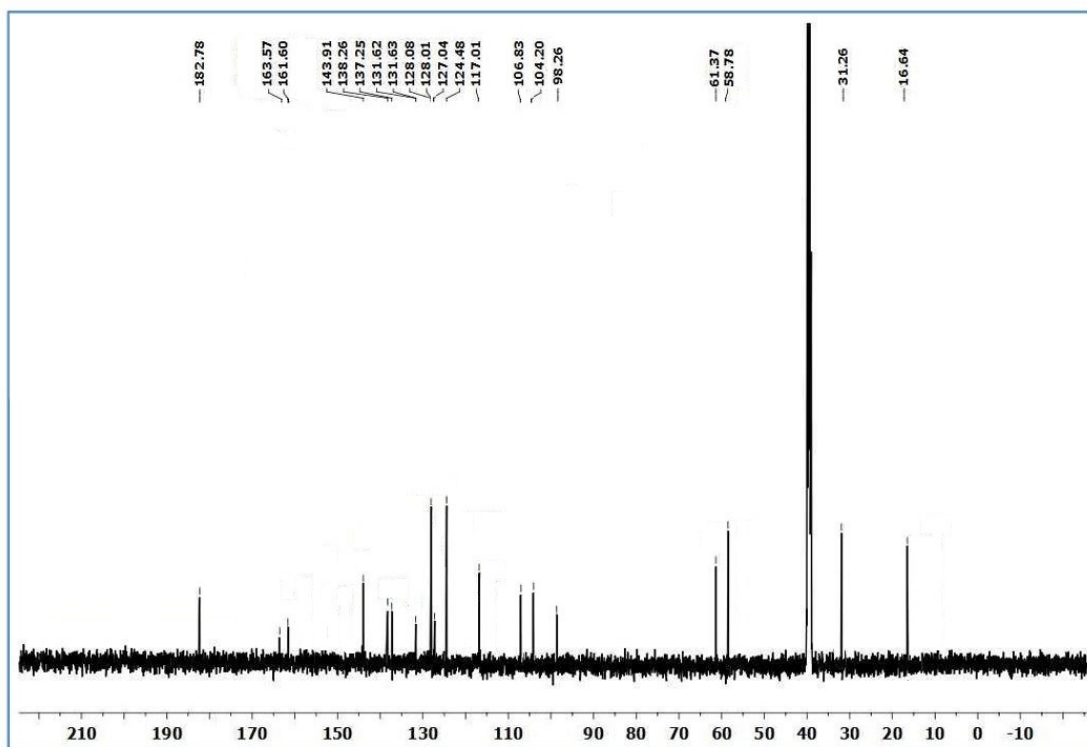

Figure S15. <sup>13</sup>C NMR spectrum of 8d

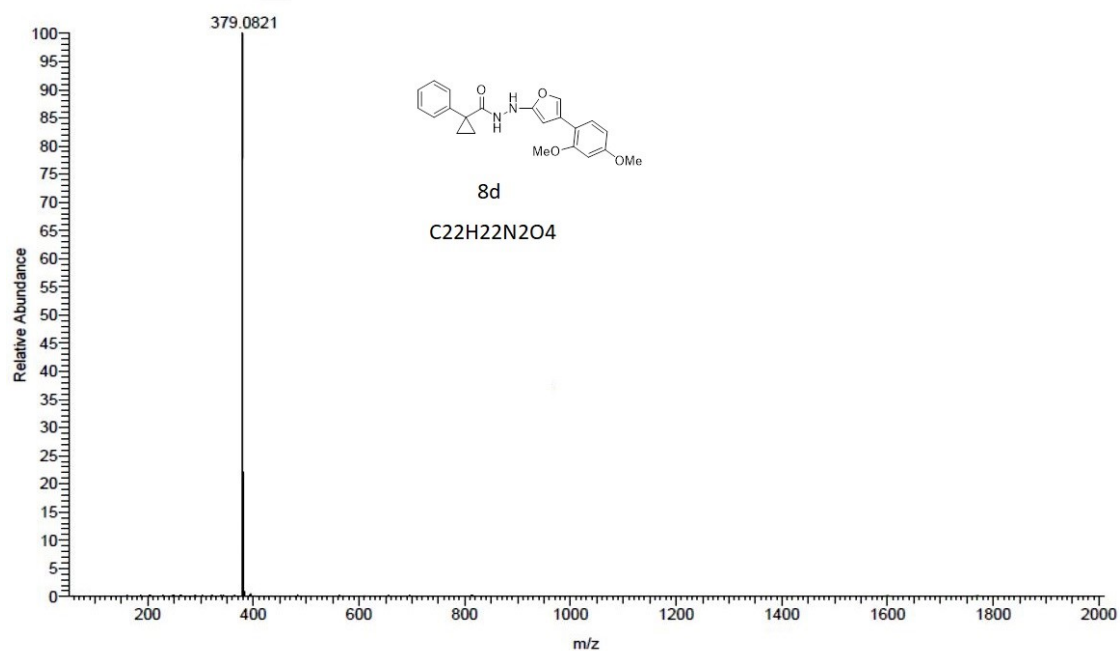

Figure S16. HRMS spectrum of **8d**

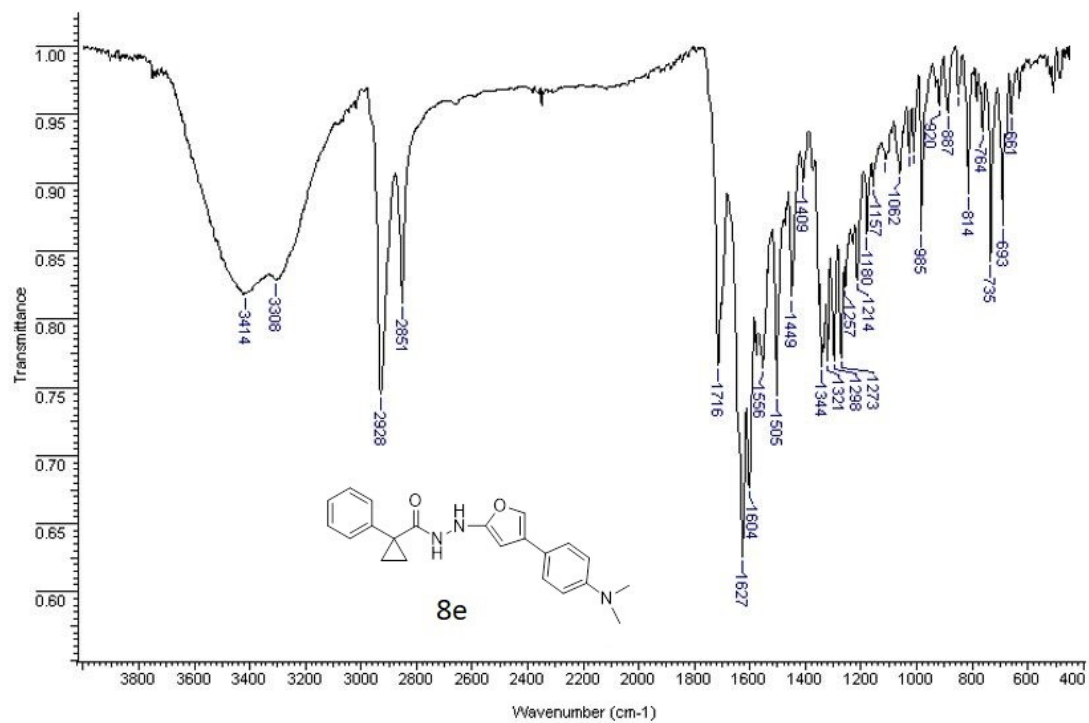

Figure S17. IR spectrum of **8e**

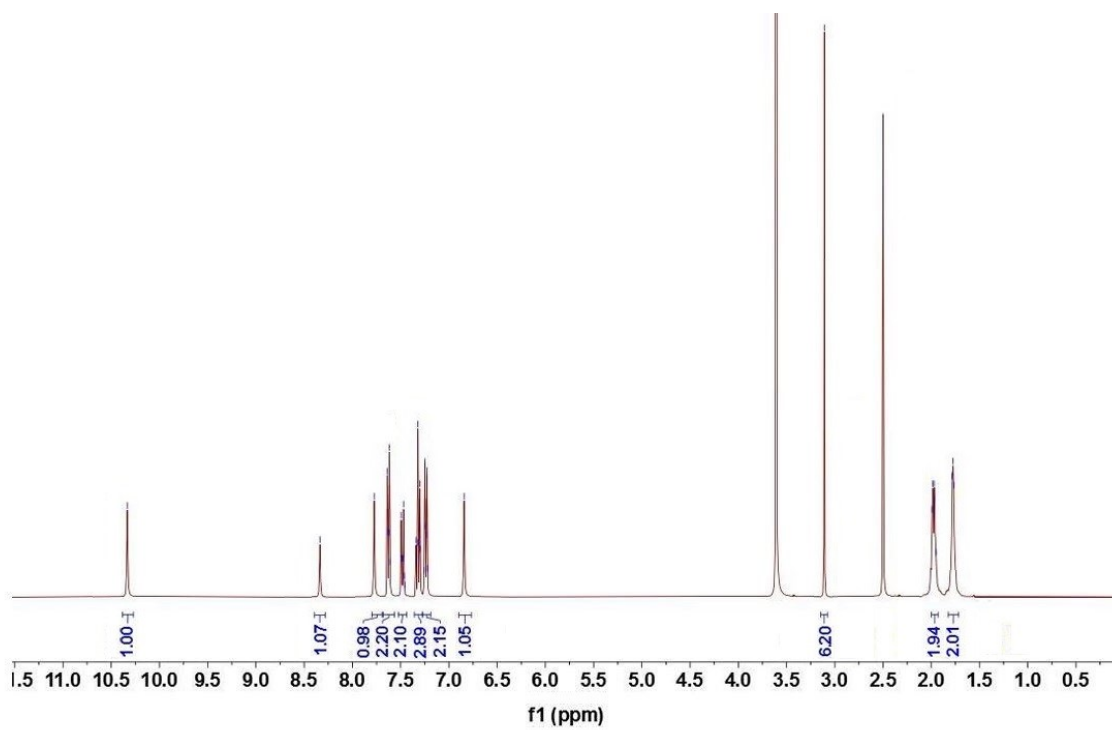

Figure S18. <sup>1</sup>H NMR spectrum of **8e**

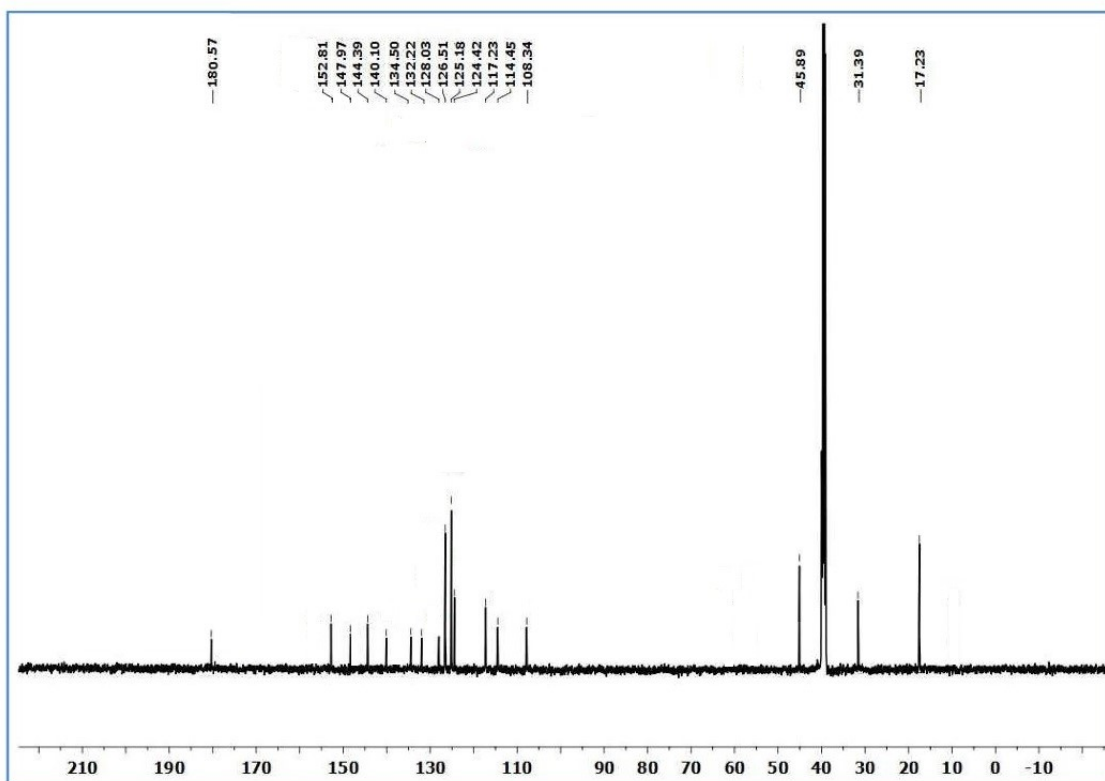

Figure S19. <sup>13</sup>C NMR spectrum of **8e**

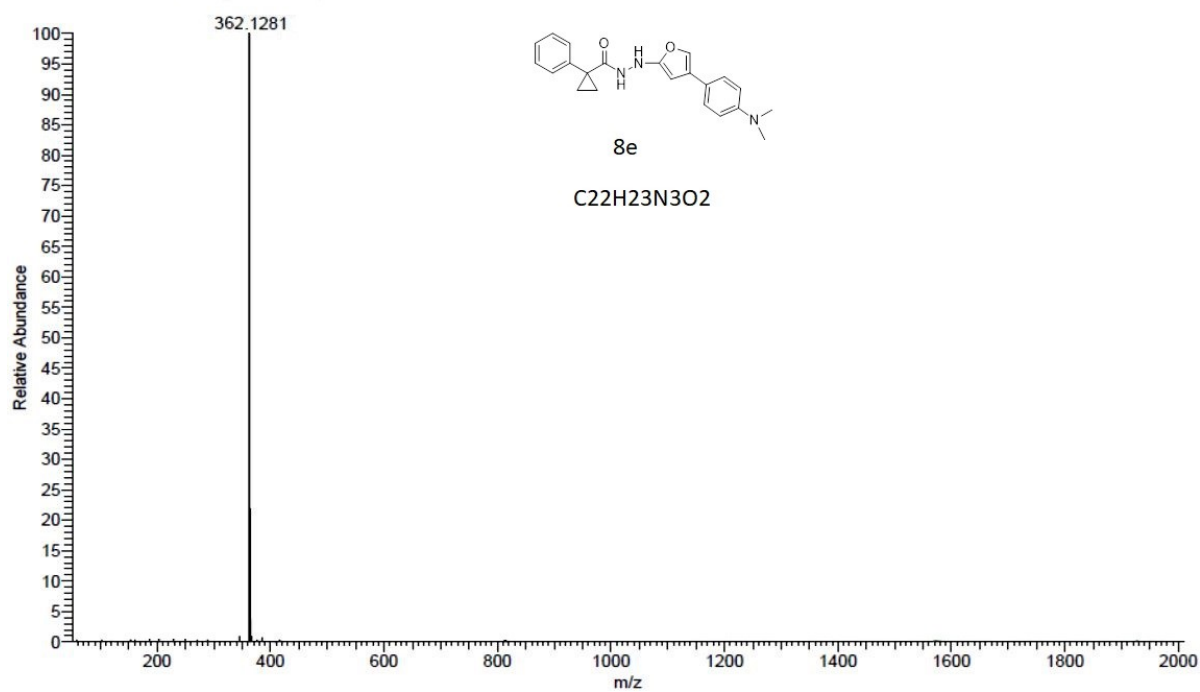

Figure S20. HRMS spectrum of **8e**

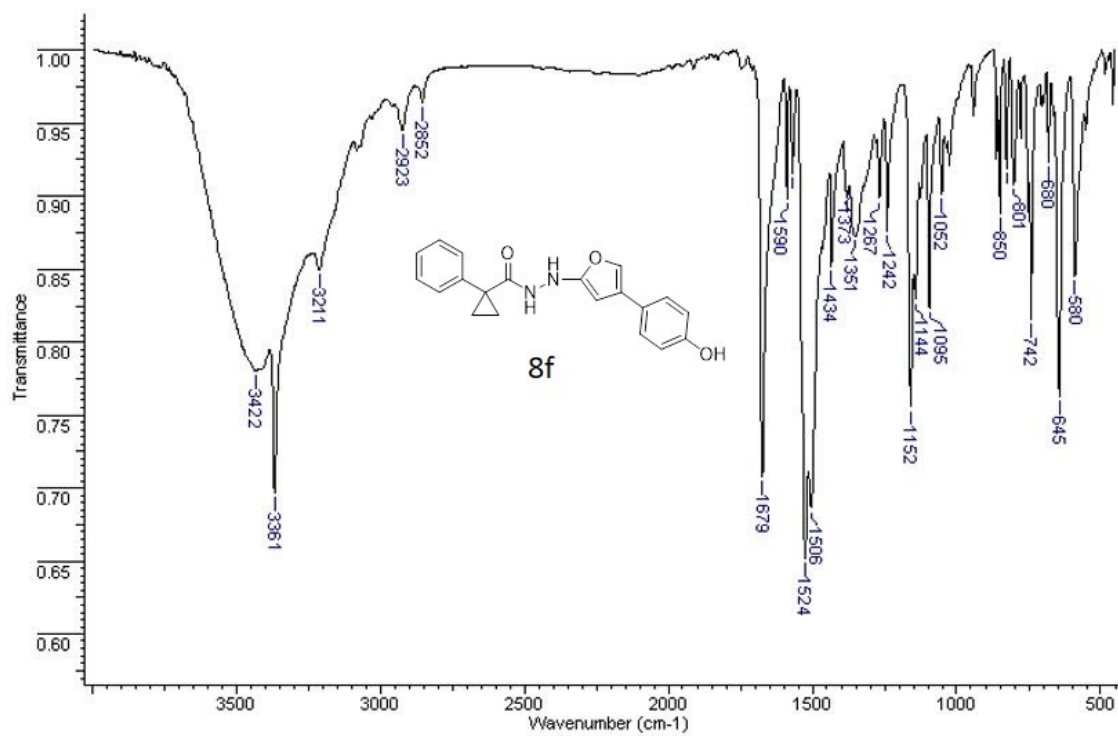

Figure S21. IR spectrum of **8f**

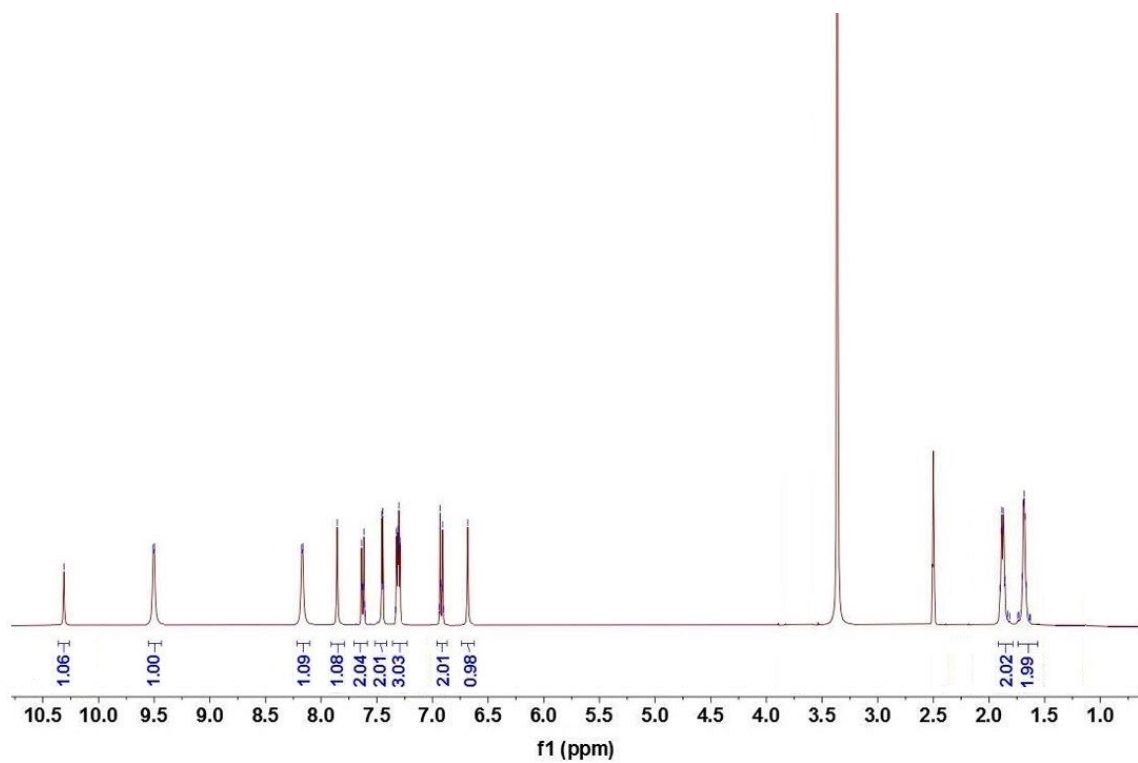

Figure S22. <sup>1</sup>H NMR spectrum of **8f**

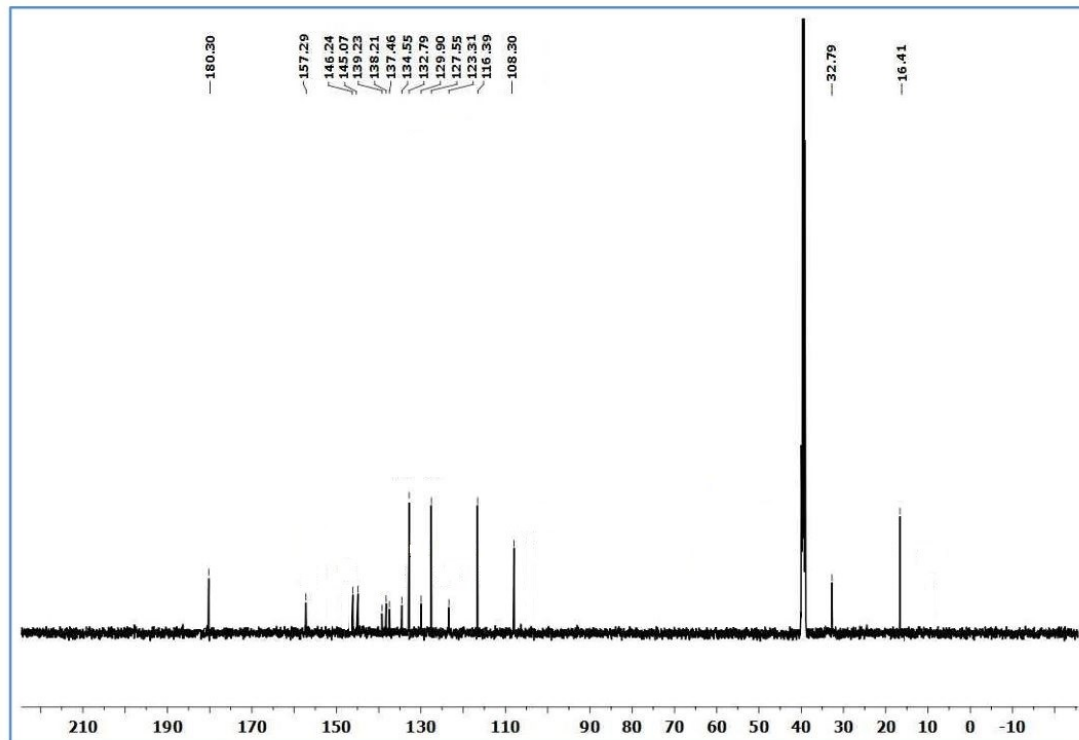

Figure S23. <sup>13</sup>C NMR spectrum of **8f**

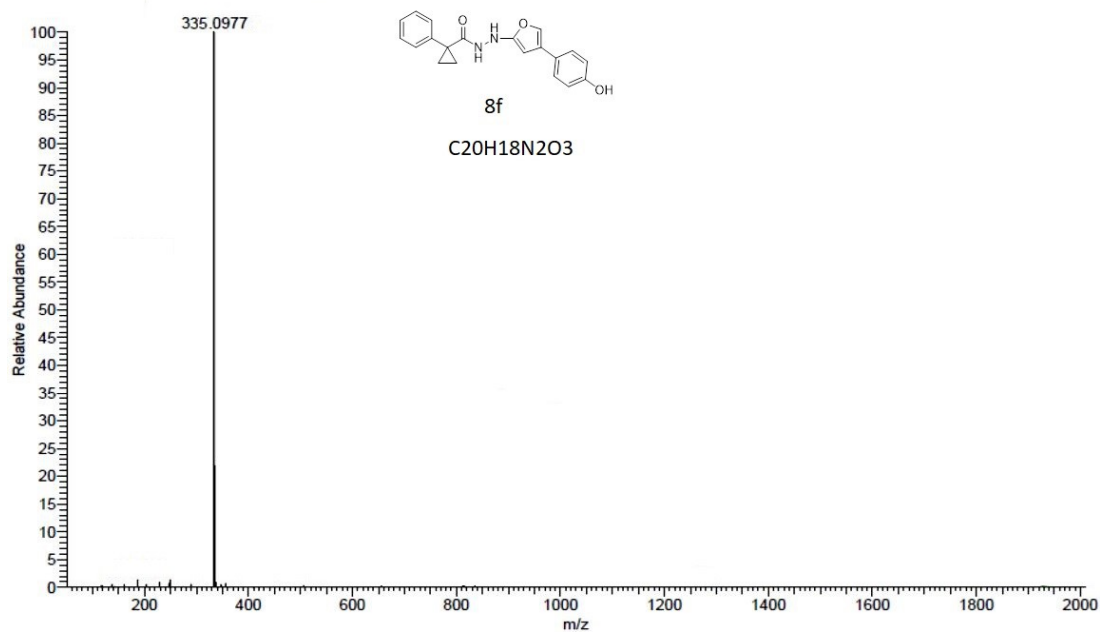

Figure S24. HRMS spectrum of **8f**

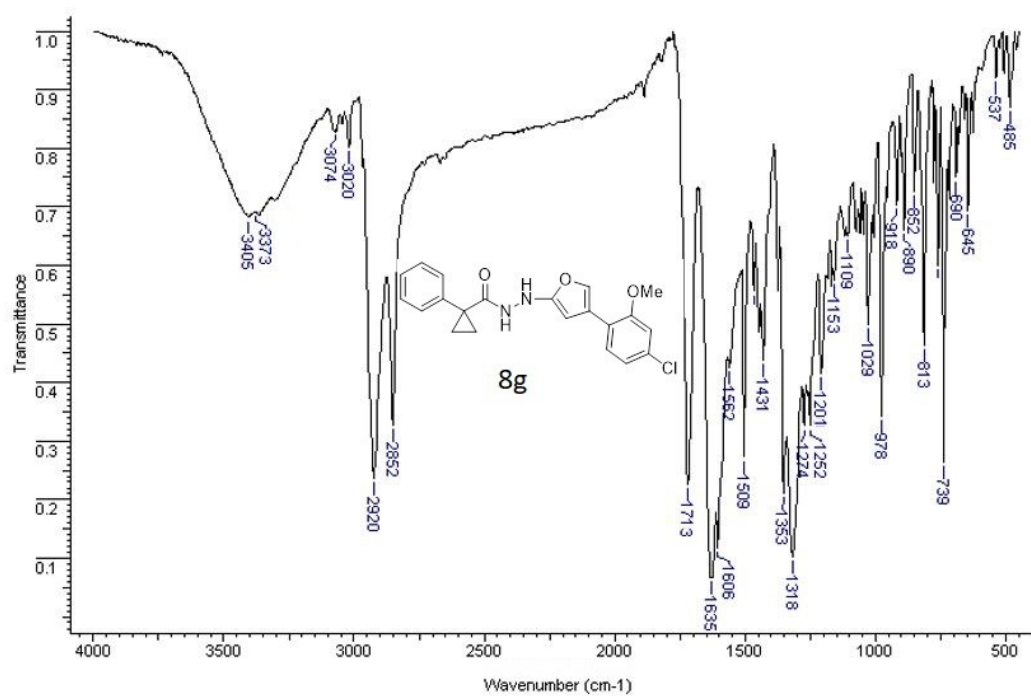

Figure S25. IR spectrum of **8g**

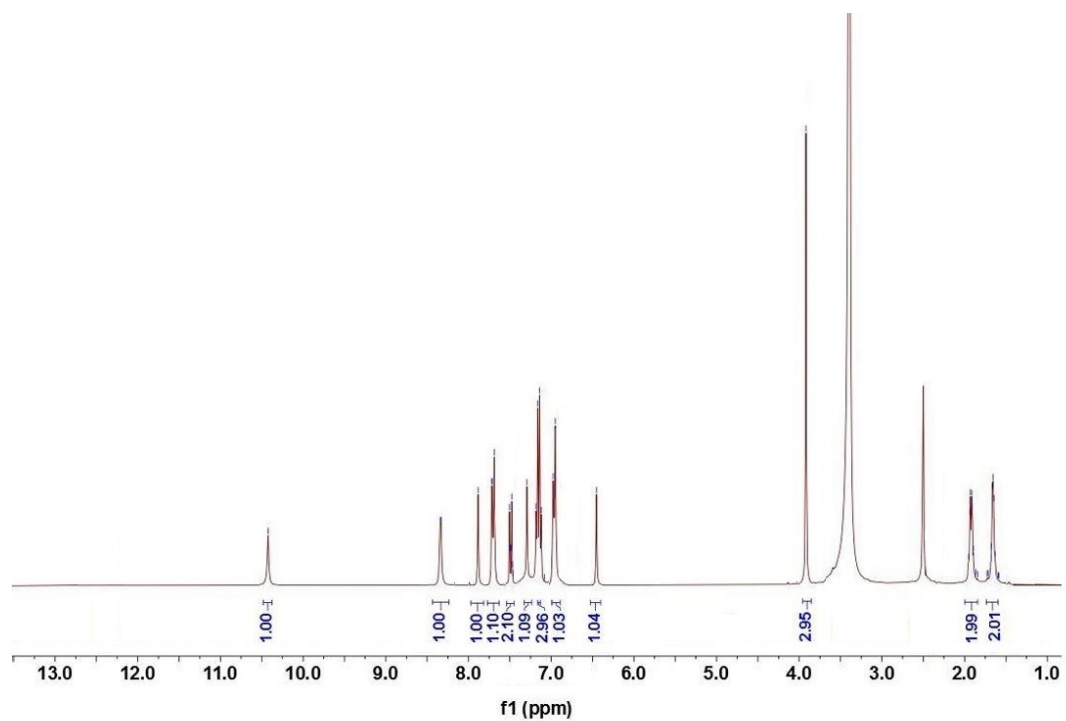

Figure S26. <sup>1</sup>H NMR spectrum of **8g**

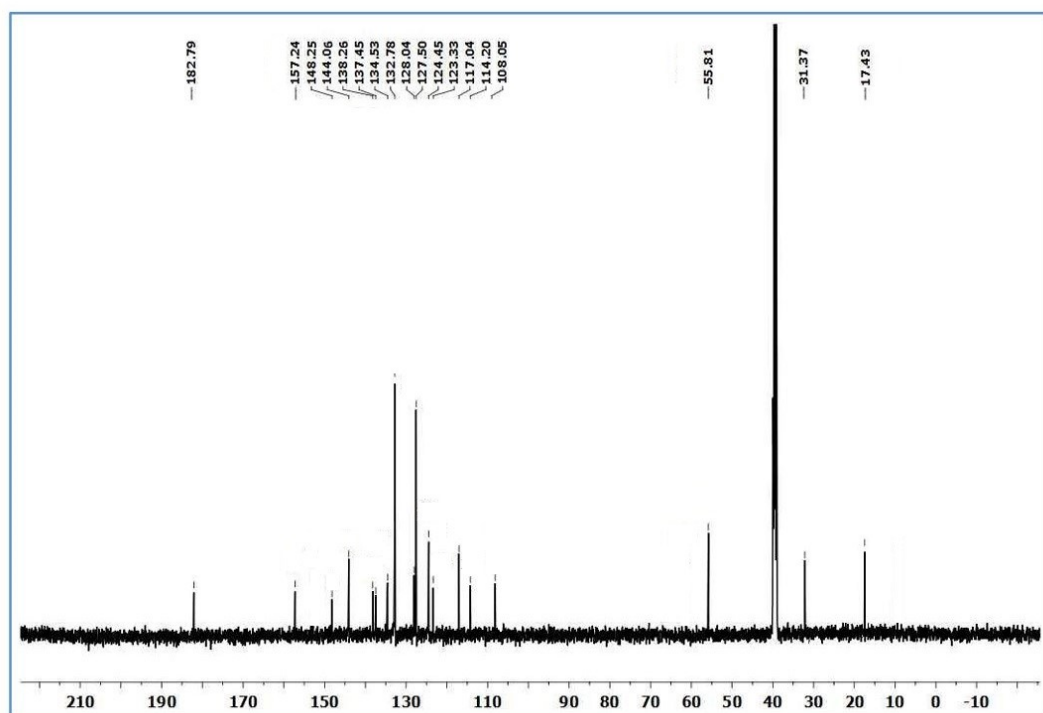

Figure S27. <sup>13</sup>C NMR spectrum of **8g**

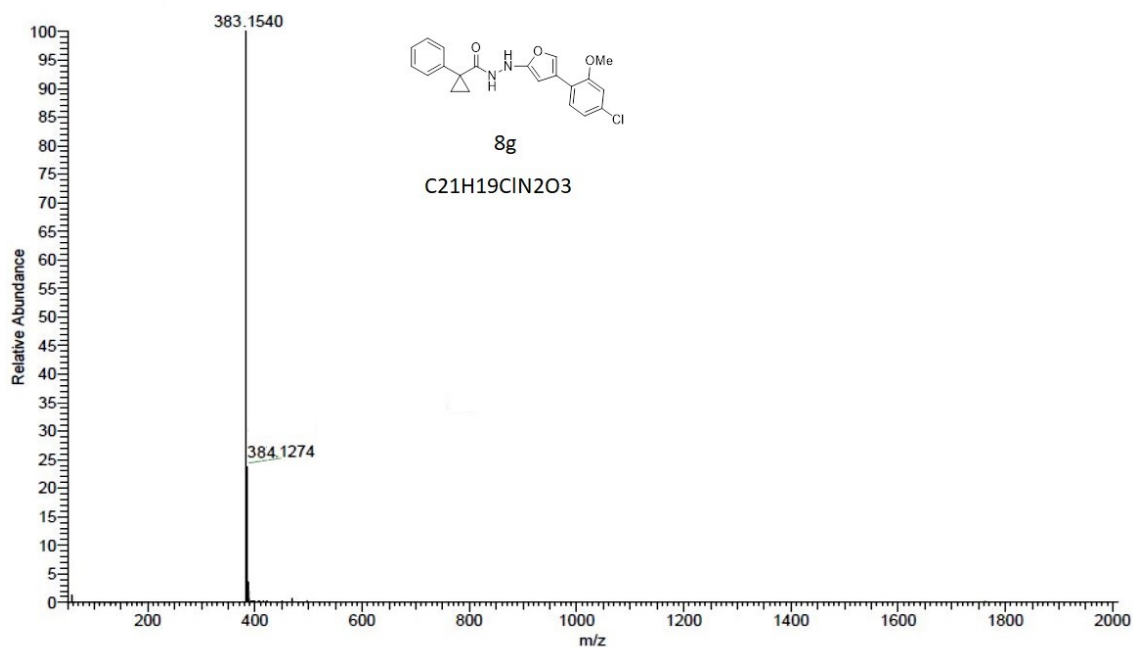

Figure S28. HRMS spectrum of **8g**

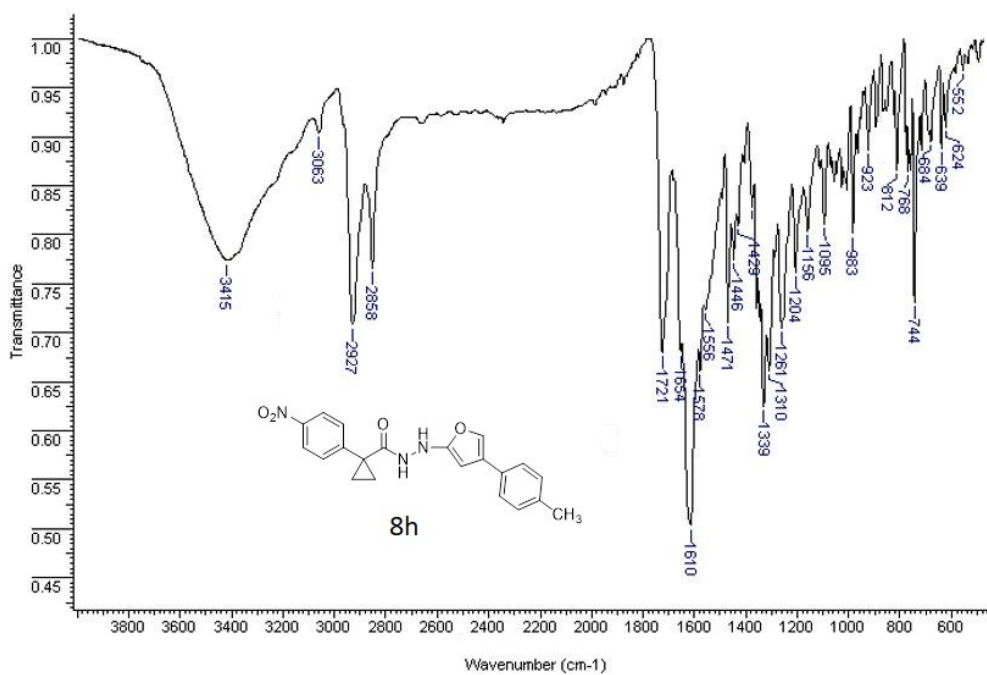

Figure S29. IR spectrum of **8h**

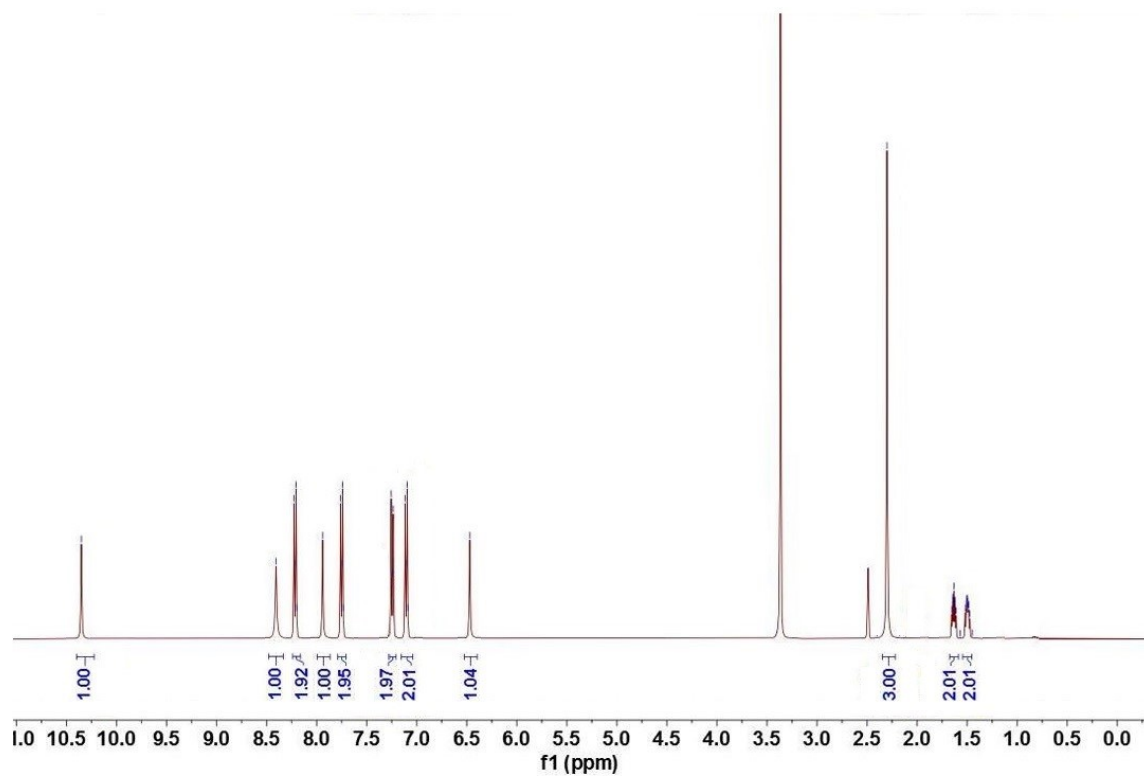

Figure S30.  $^1\text{H}$  NMR spectrum of **8h**

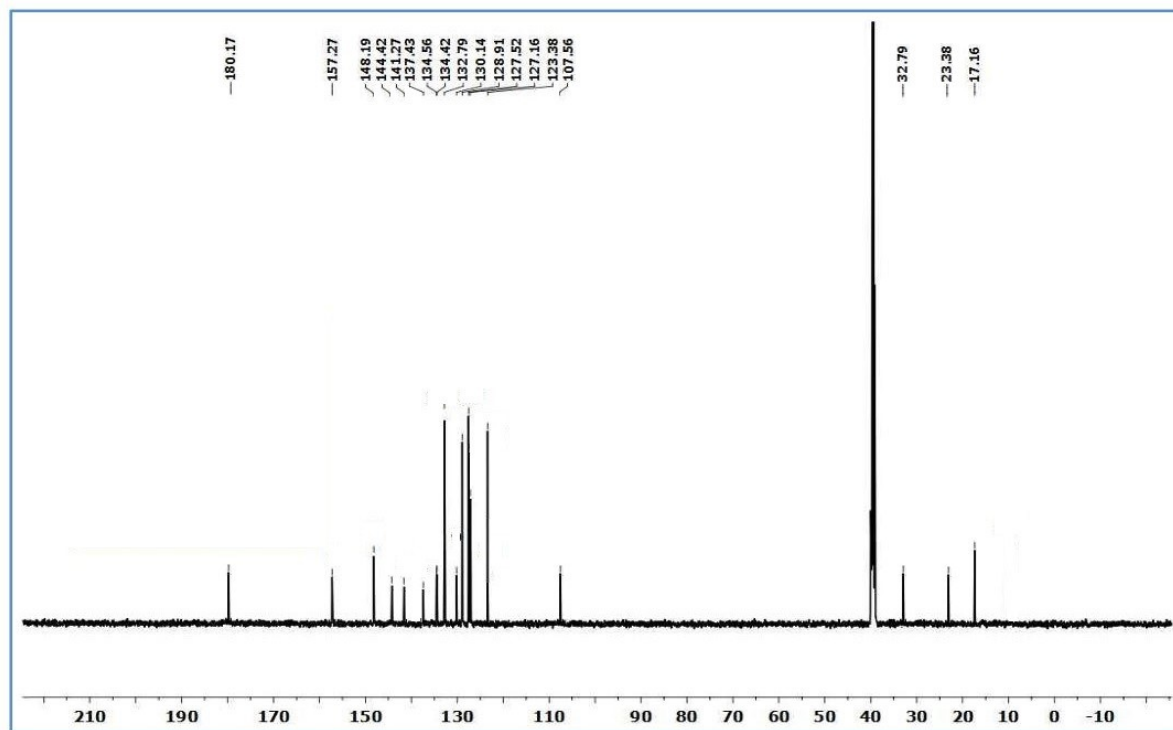

Figure S31.  $^{13}\text{C}$  NMR spectrum of **8h**

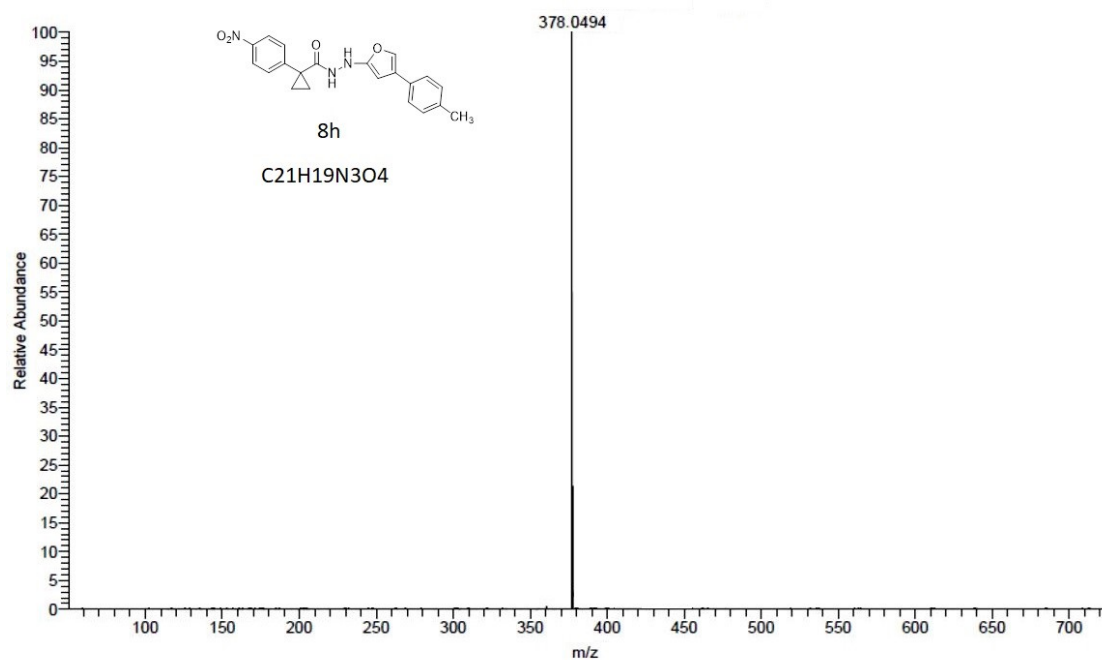

**Figure S32.** HRMS spectrum of **8h**

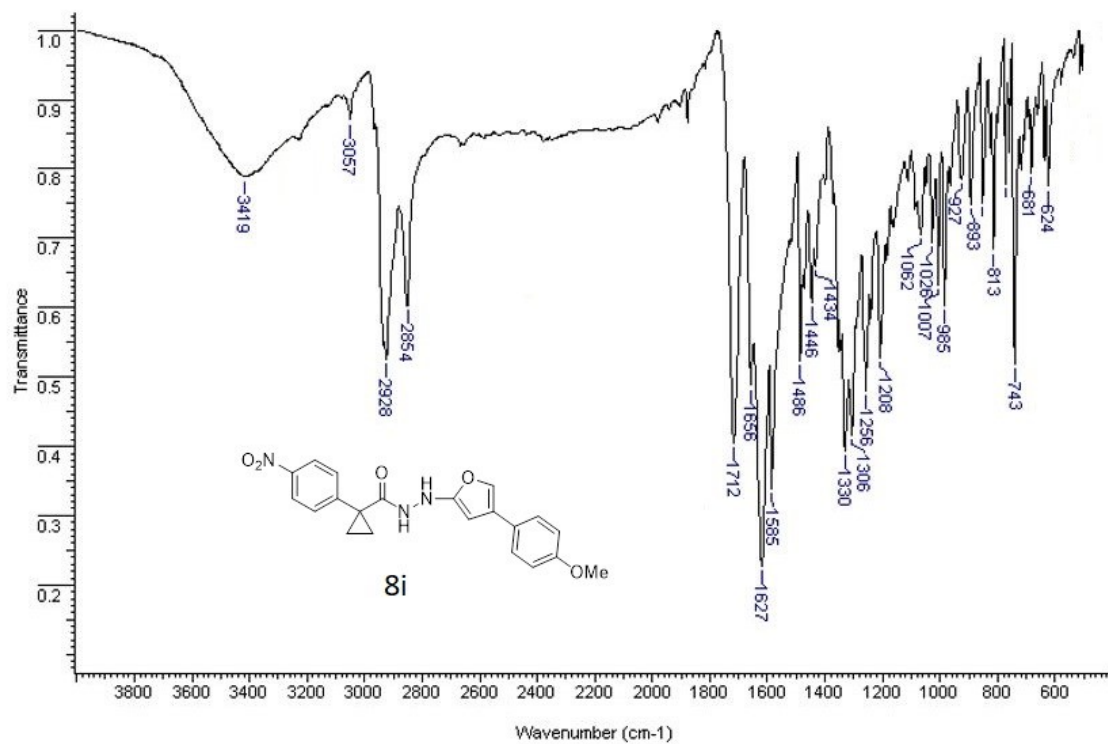

**Figure S33.** IR spectrum of **8i**

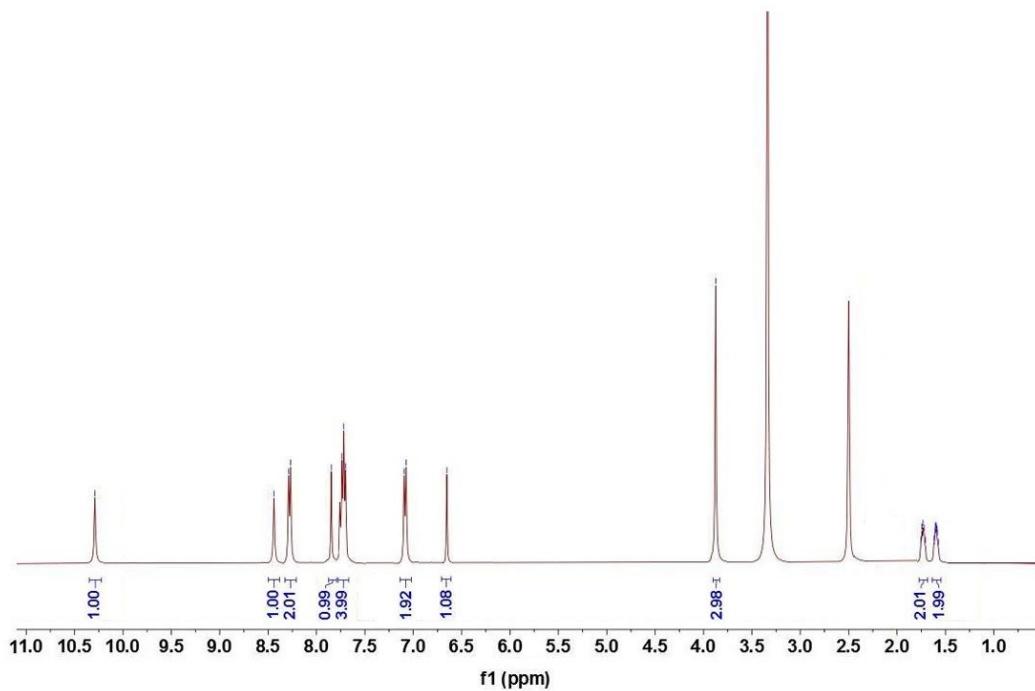

Figure S34. <sup>1</sup>H NMR spectrum of **8i**

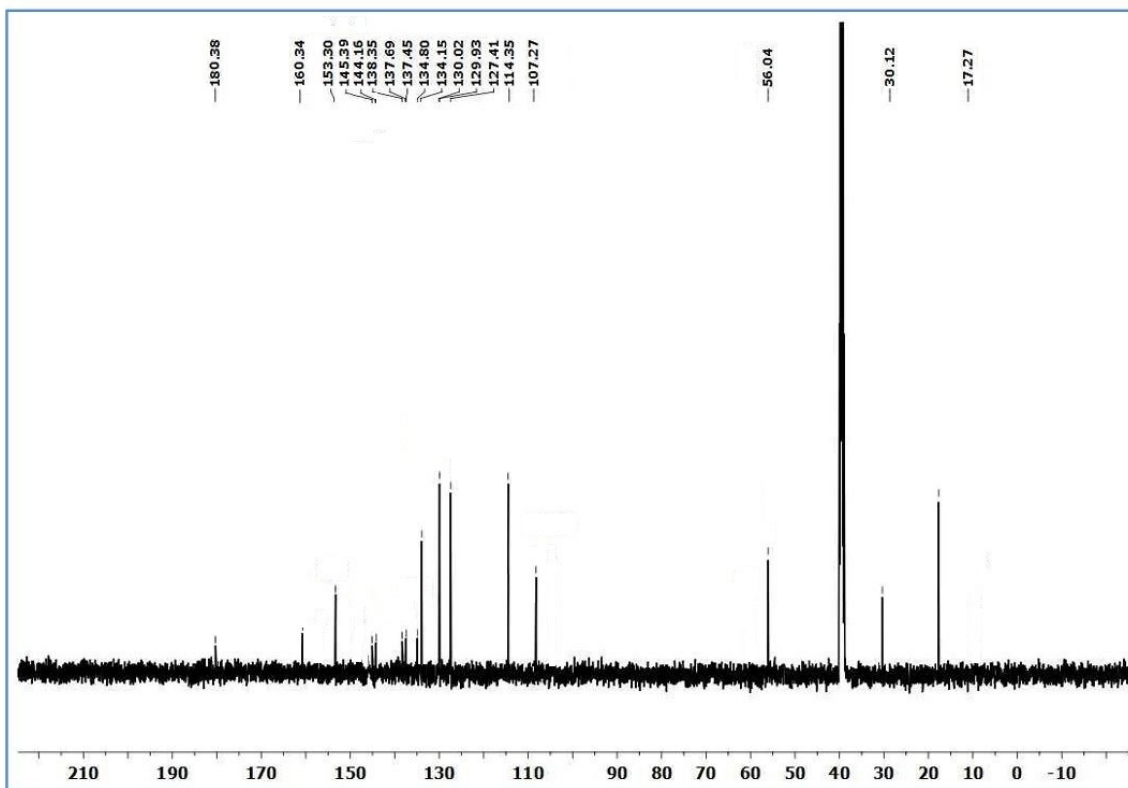

Figure S35. <sup>13</sup>C NMR spectrum of **8i**

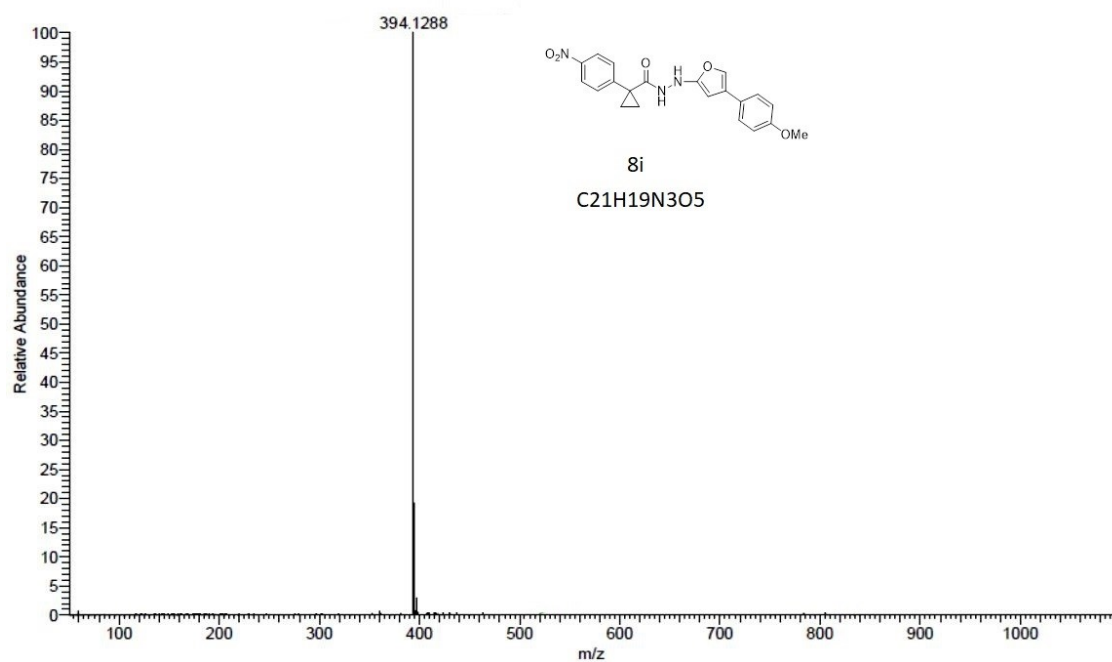

Figure S36. HRMS spectrum of **8i**

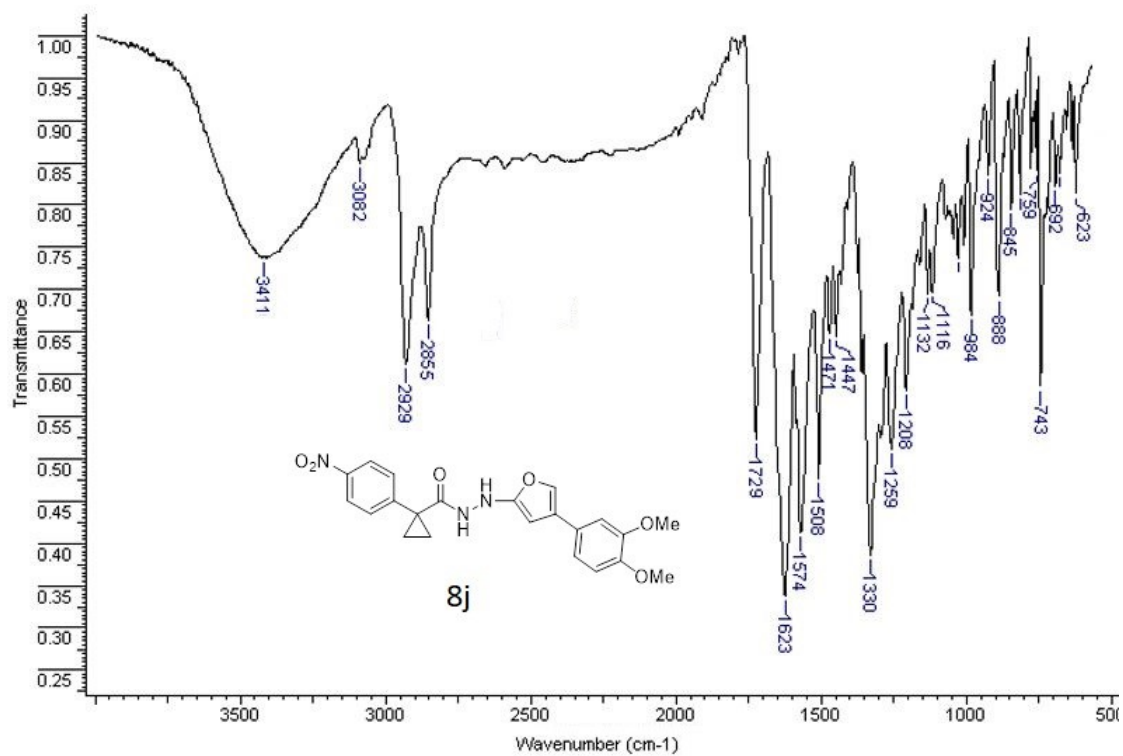

Figure S37. IR spectrum of **8j**

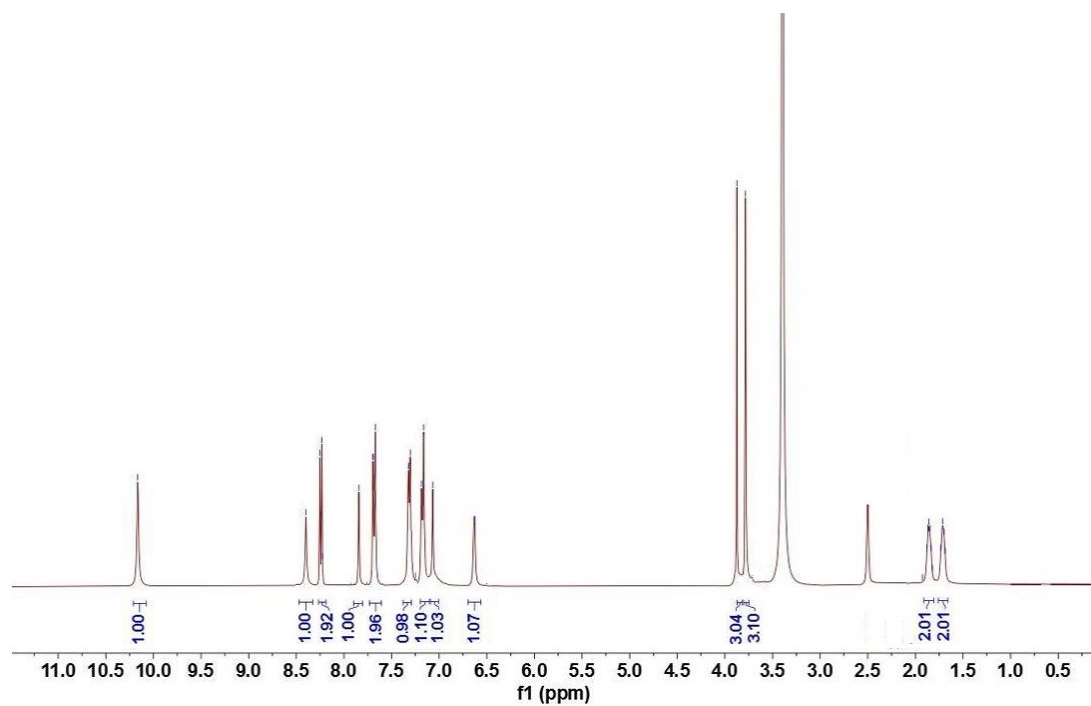

Figure S38. <sup>1</sup>H NMR spectrum of **8j**

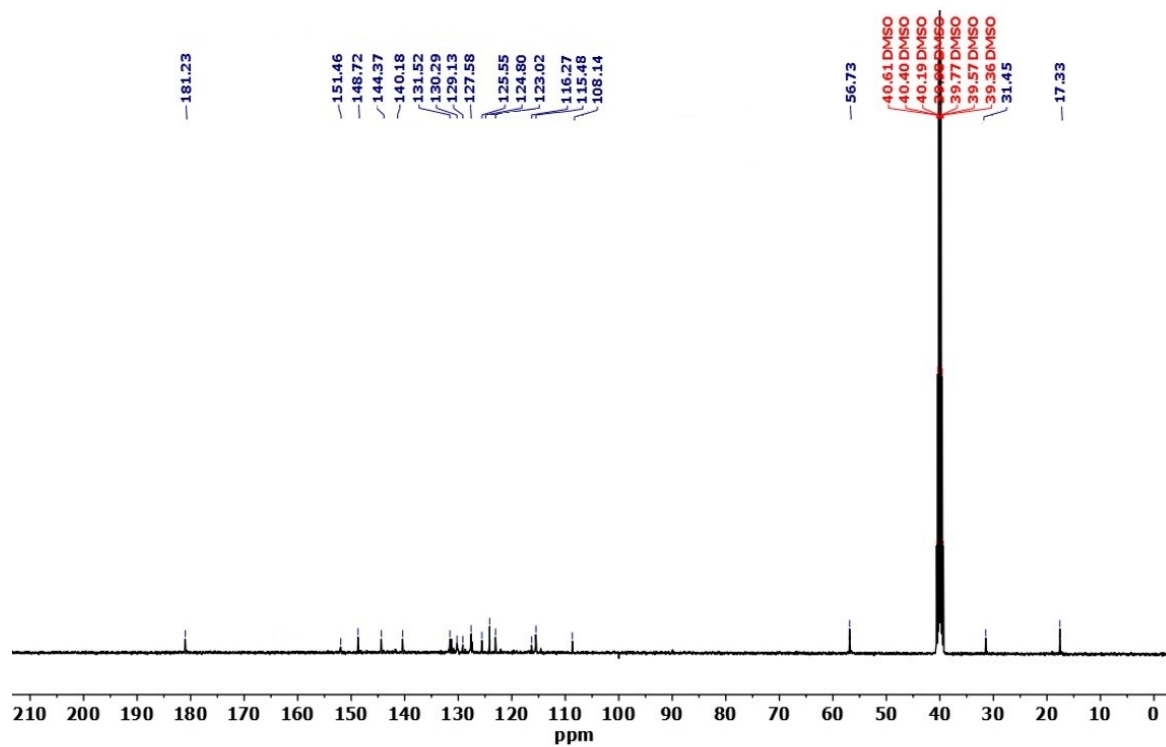

Figure S39. <sup>13</sup>C NMR spectrum of **8j**

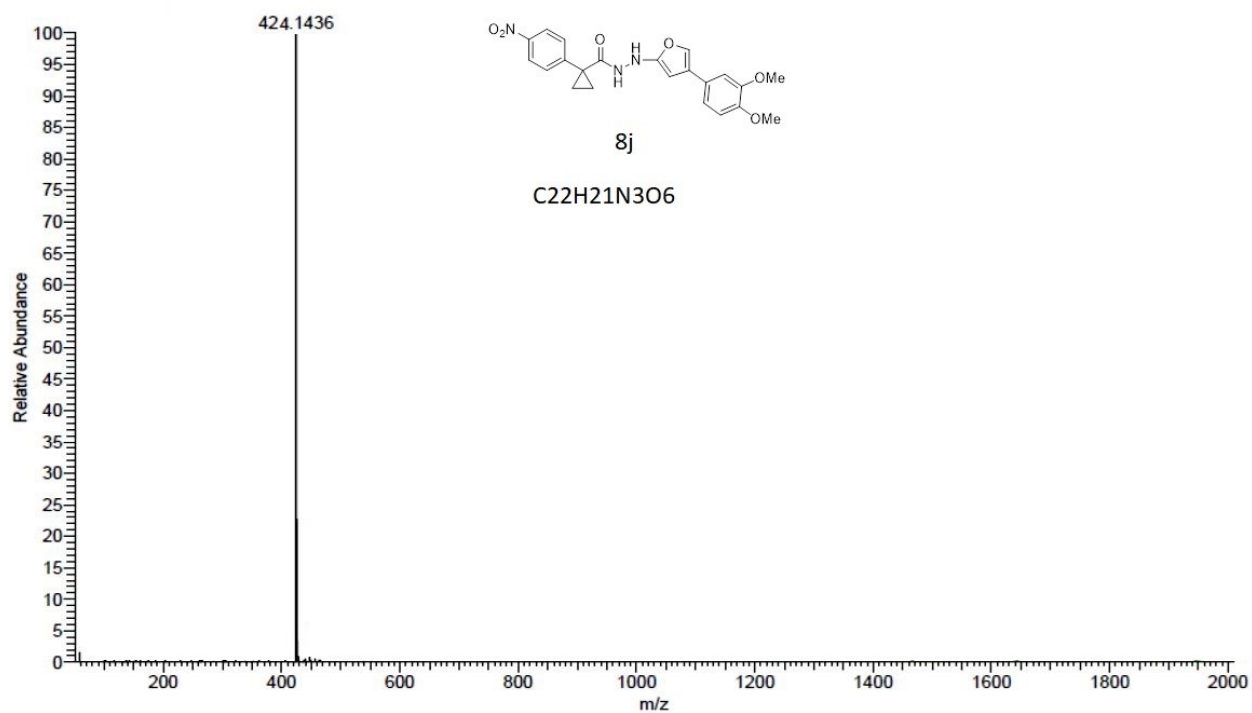

Figure S40. HRMS spectrum of **8j**

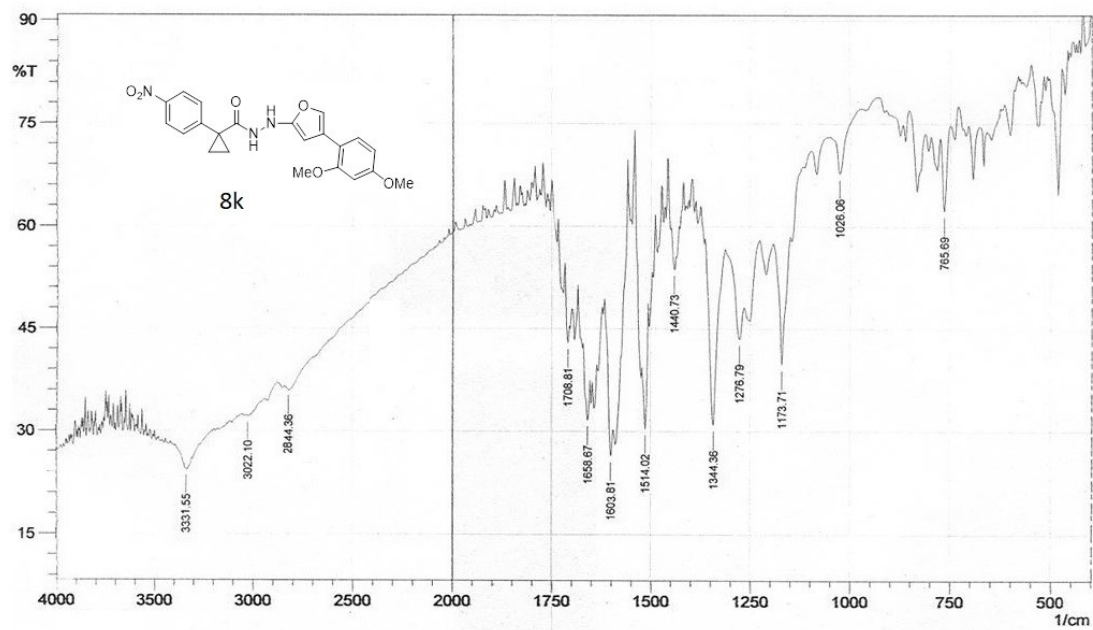

Figure S41. IR spectrum of **8k**

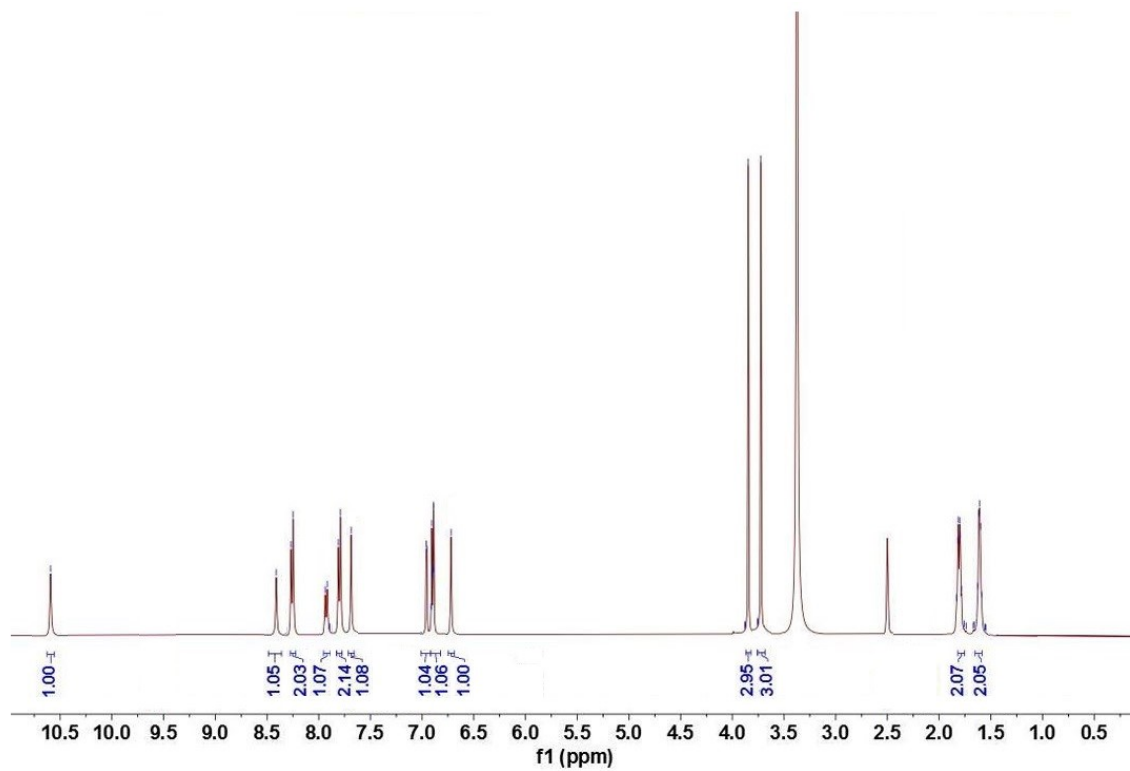

**Figure S42.** <sup>1</sup>H NMR spectrum of **8k**

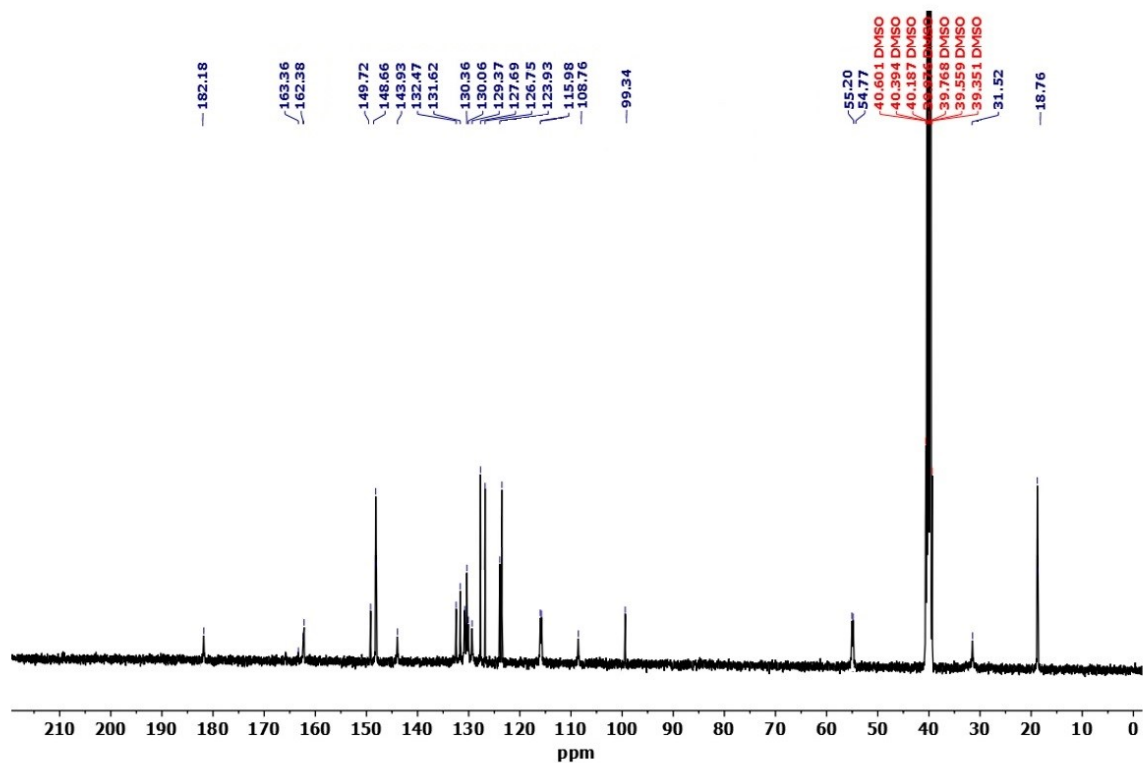

Fi

Figure S43.  $^{13}\text{C}$  NMR spectrum of **8k**

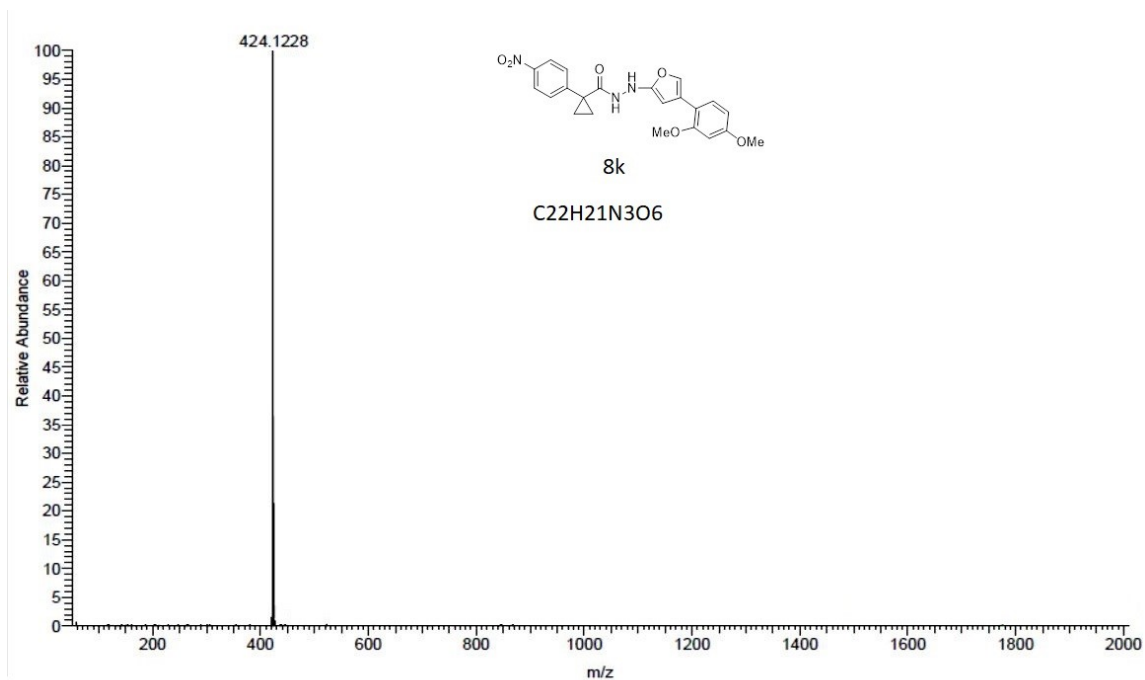

Figure S44. HRMS spectrum of **8k**

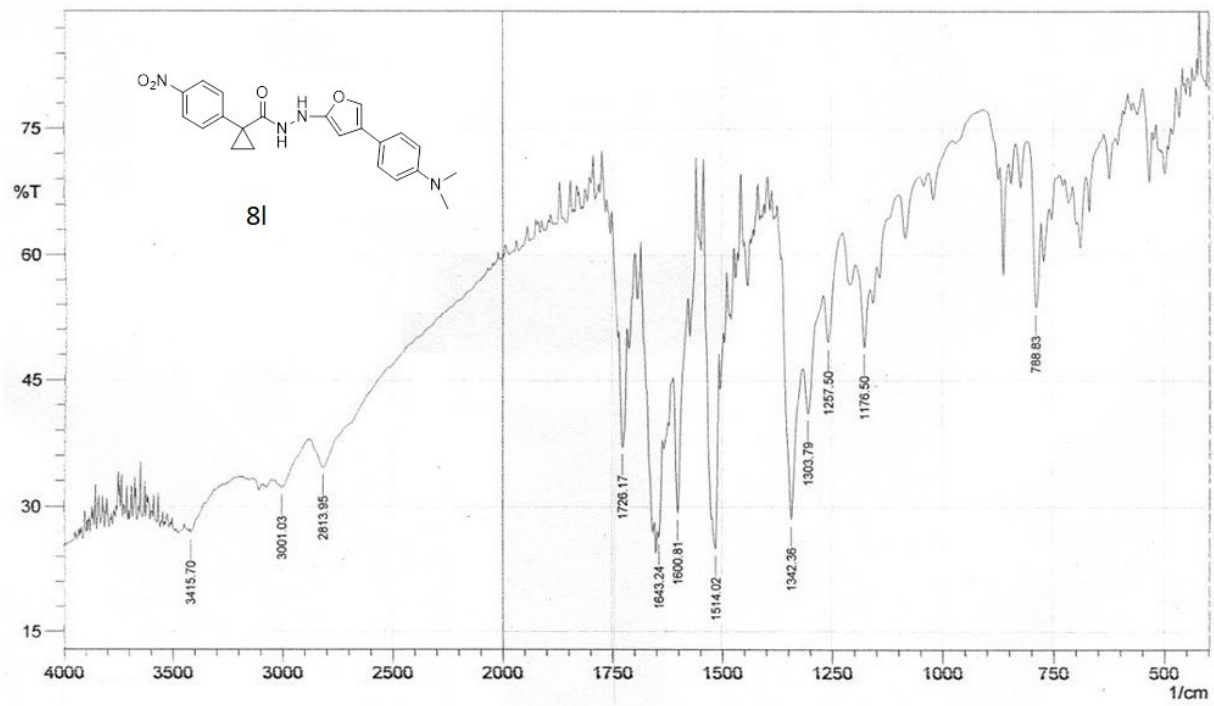

Figure S45. IR spectrum of **8l**

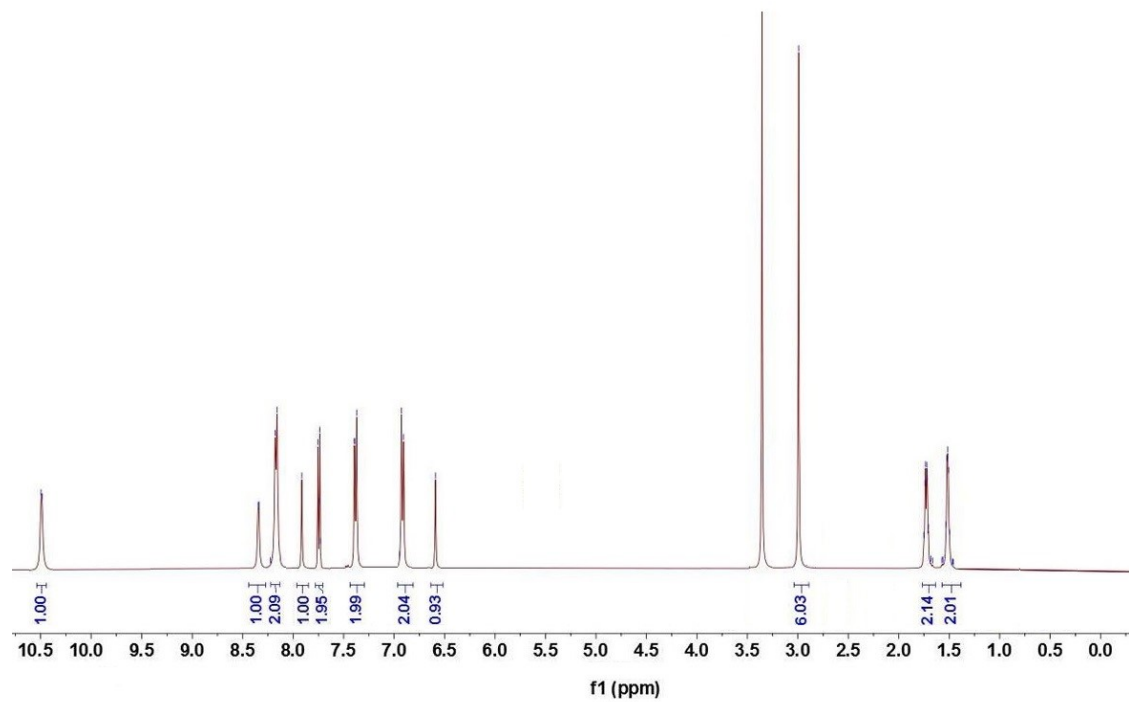

Figure S46. <sup>1</sup>H NMR spectrum of **8l**

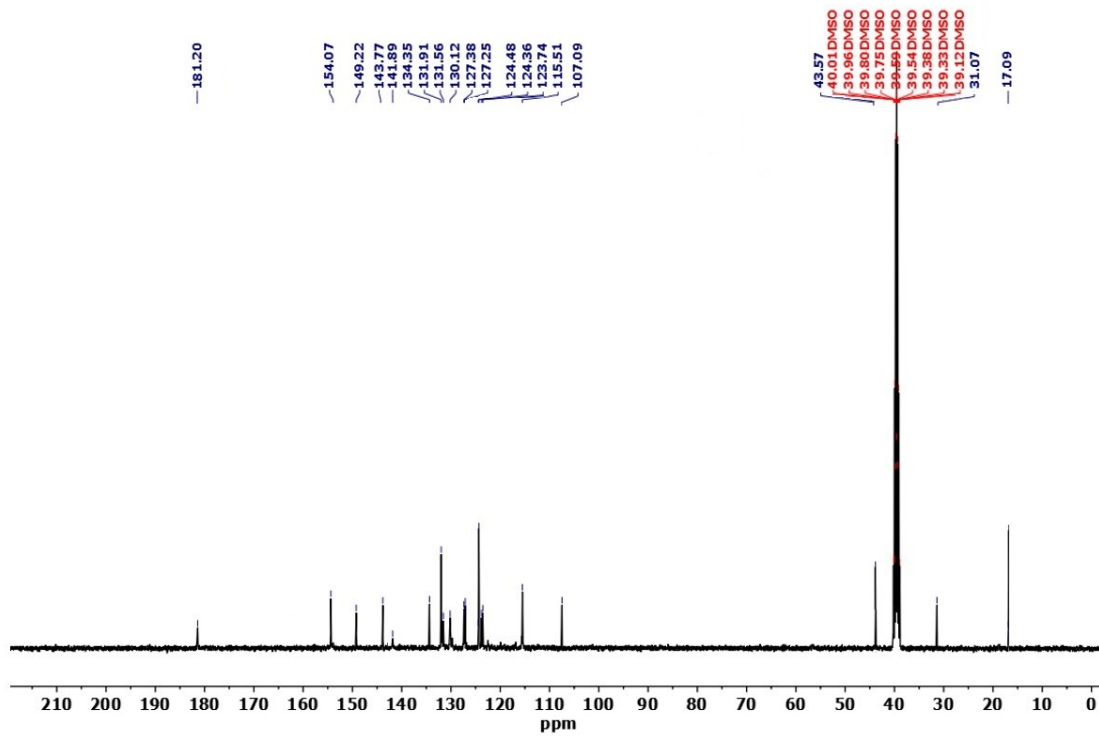

Figure S47.  $^{13}\text{C}$  NMR spectrum of **8I**

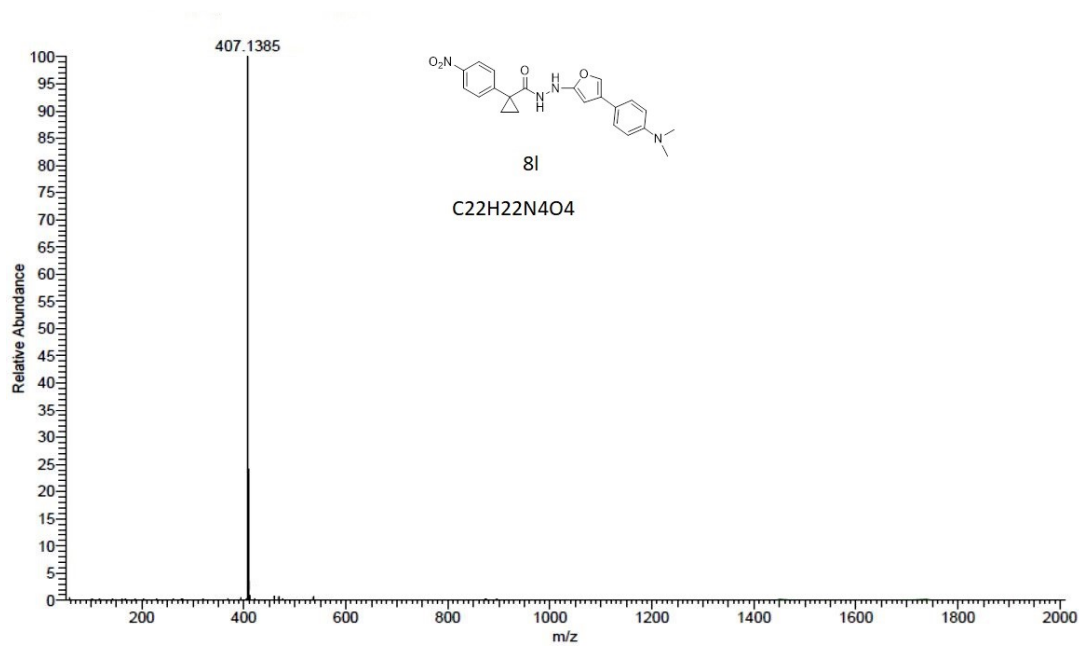

Figure S48. HRMS spectrum of **8I**

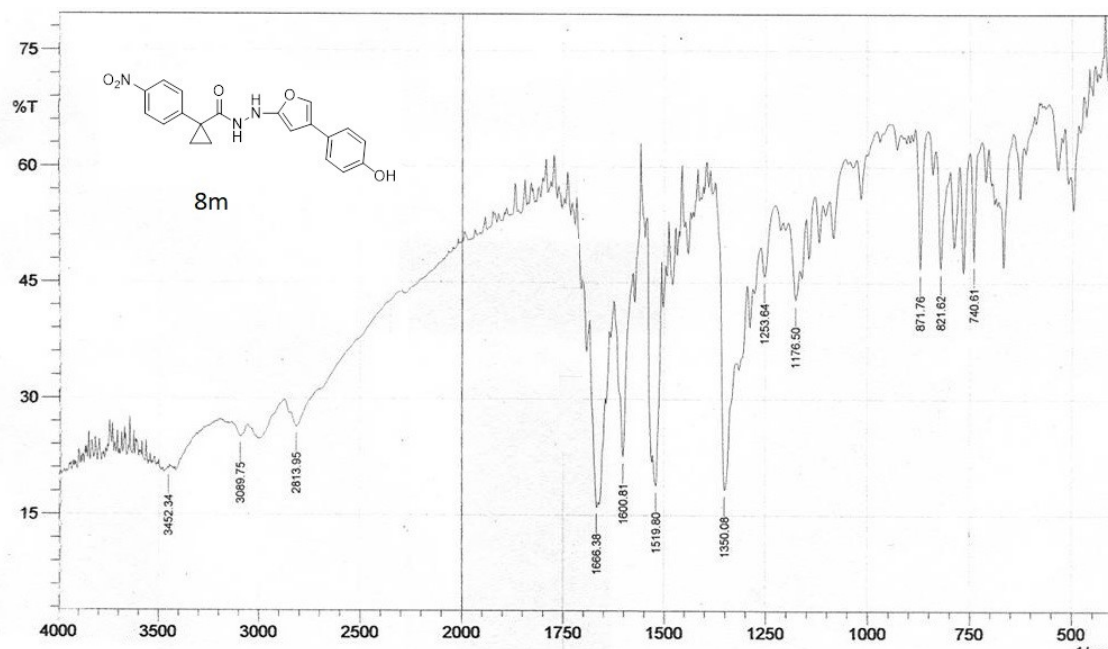

Figure S49. IR spectrum of **8m**

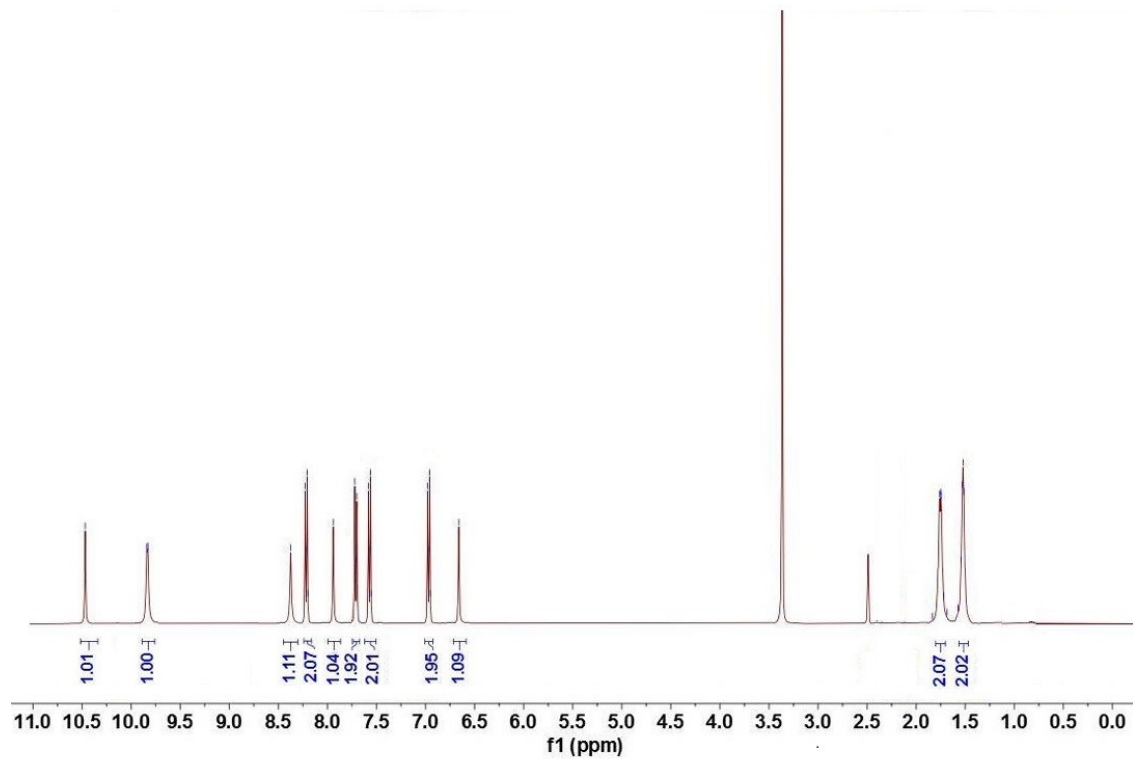

Figure S50. <sup>1</sup>H NMR spectrum of **8m**

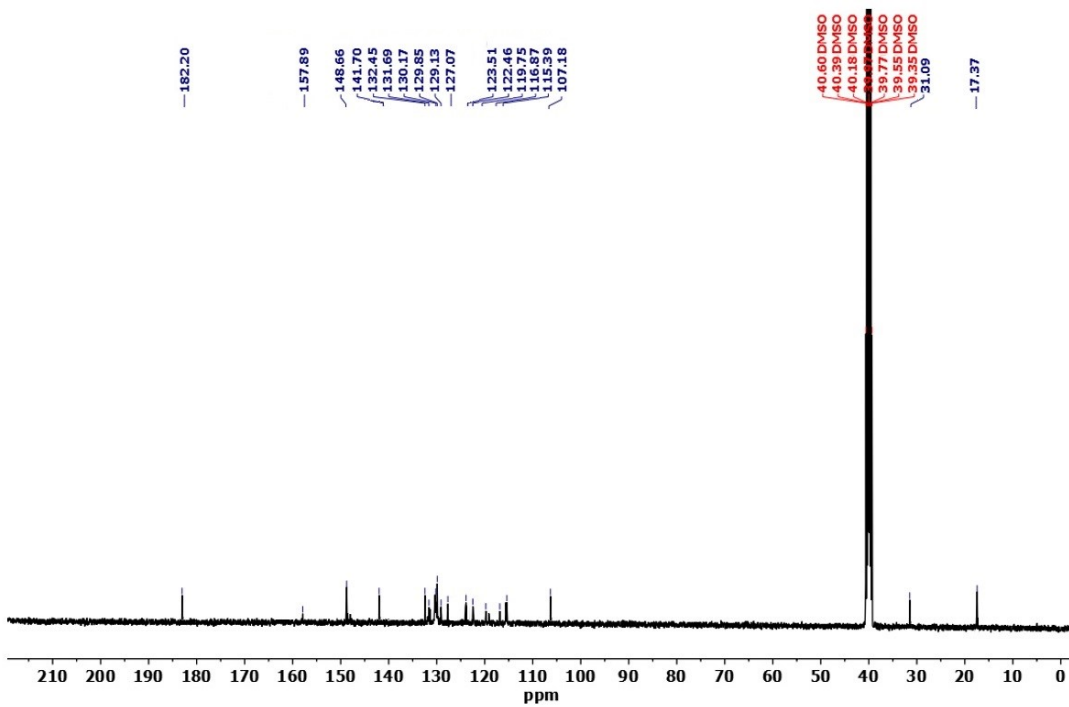

Figure S51.  $^{13}\text{C}$  NMR spectrum of **8m**

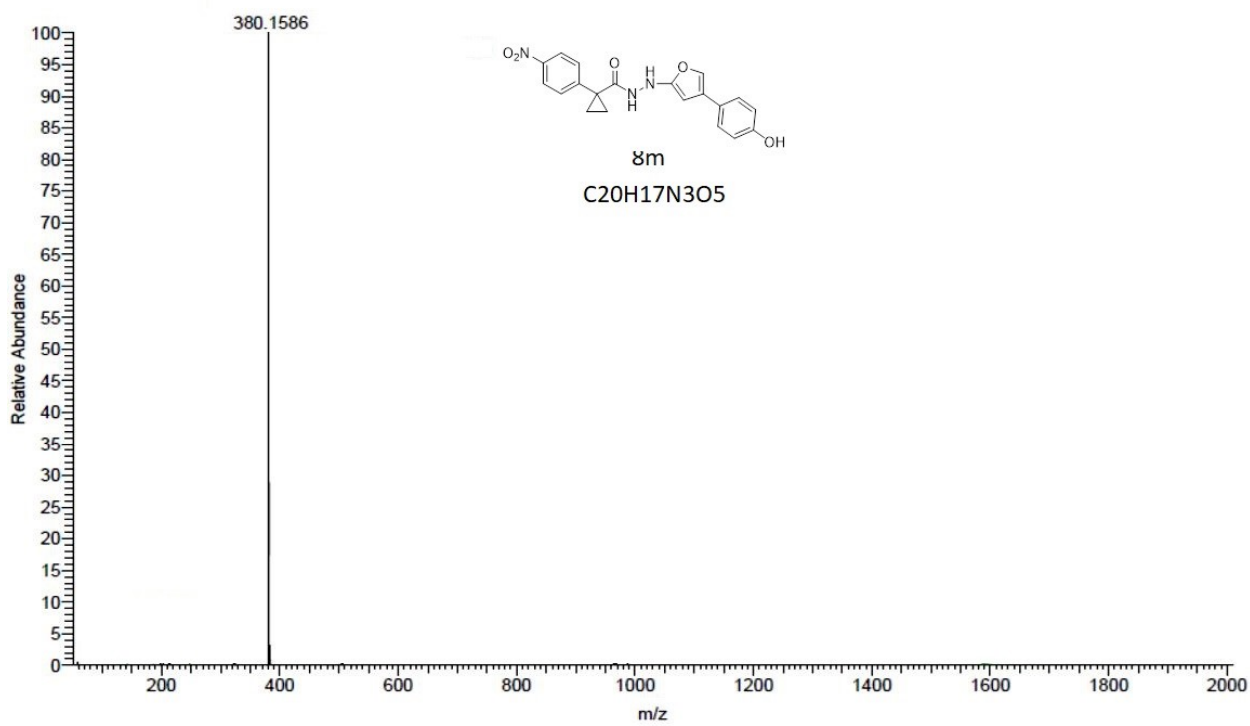

Figure S52. HRMS spectrum of **8m**

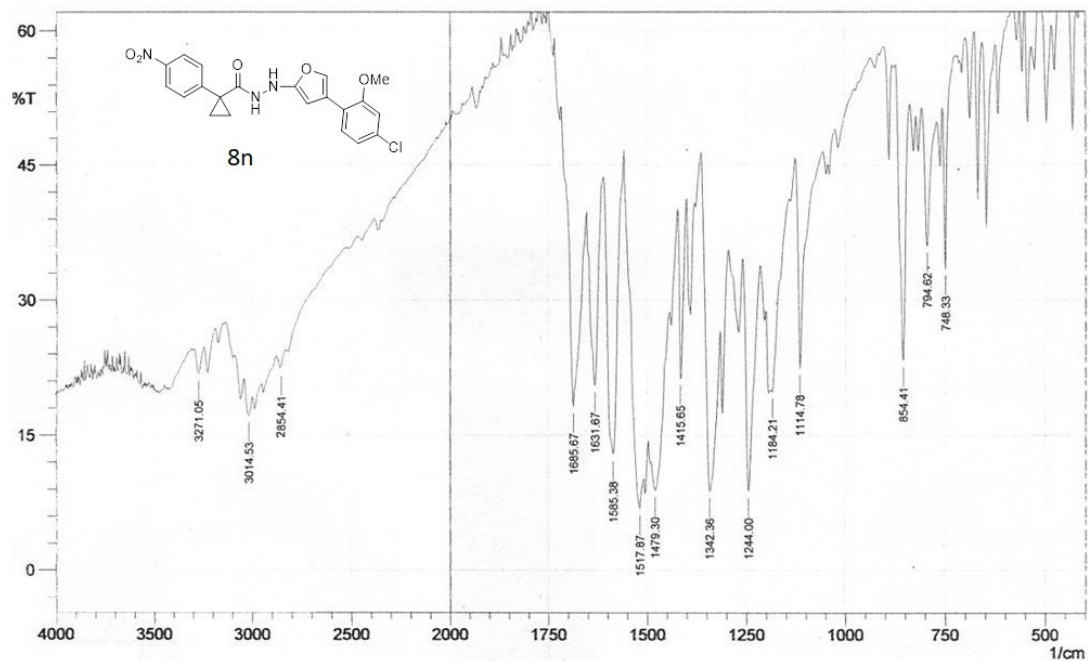

Figure S53. IR spectrum of **8n**

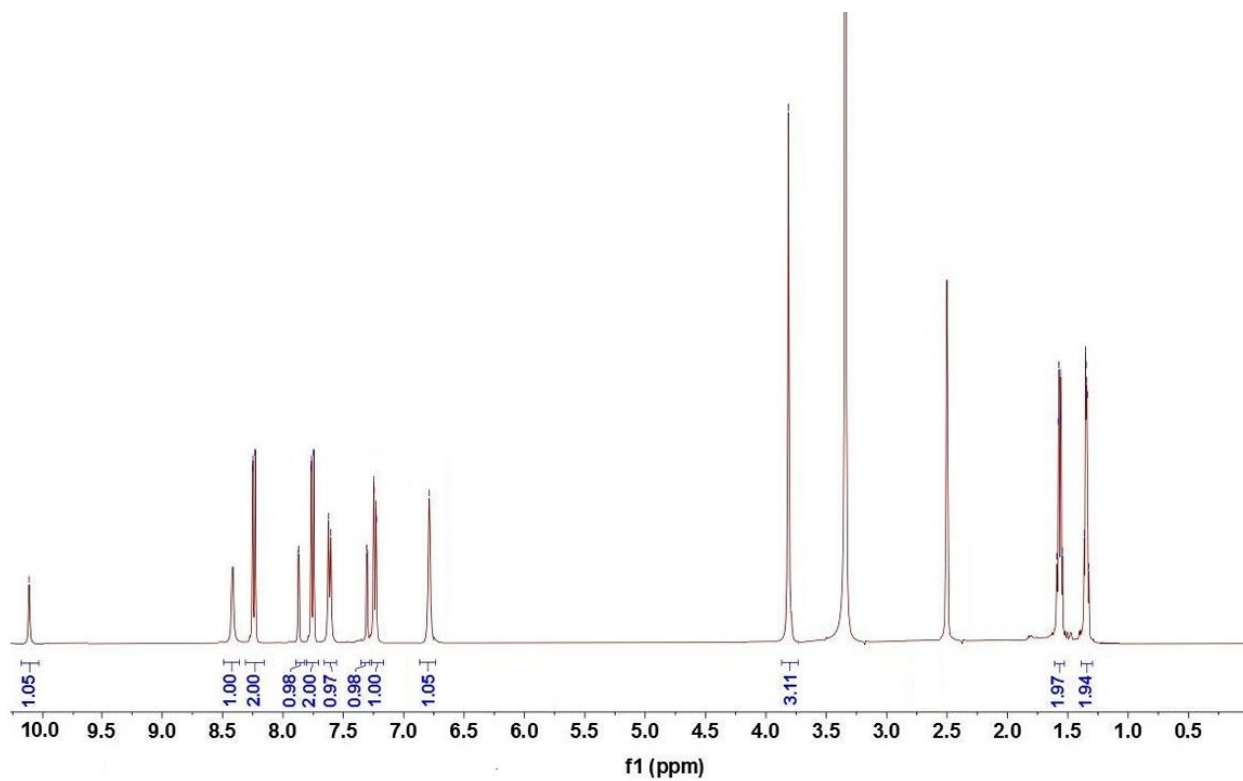

Figure S54.  $^1\text{H}$  NMR spectrum of **8n**

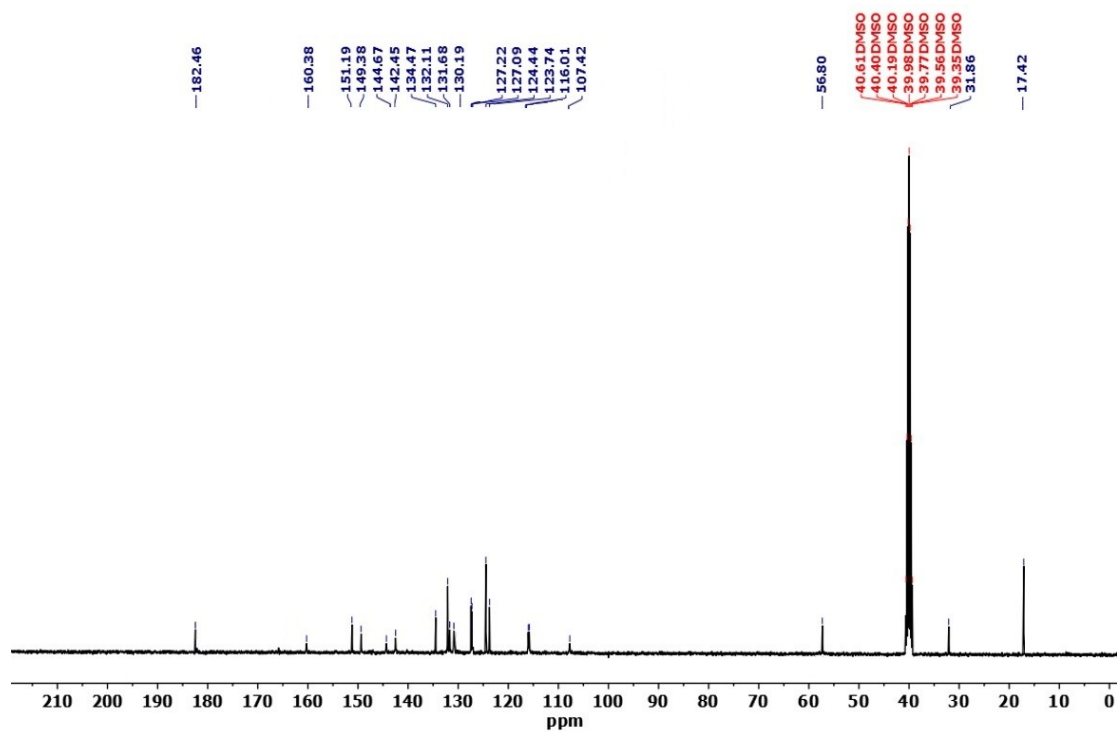

Figure S55.  $^{13}\text{C}$  NMR spectrum of **8n**

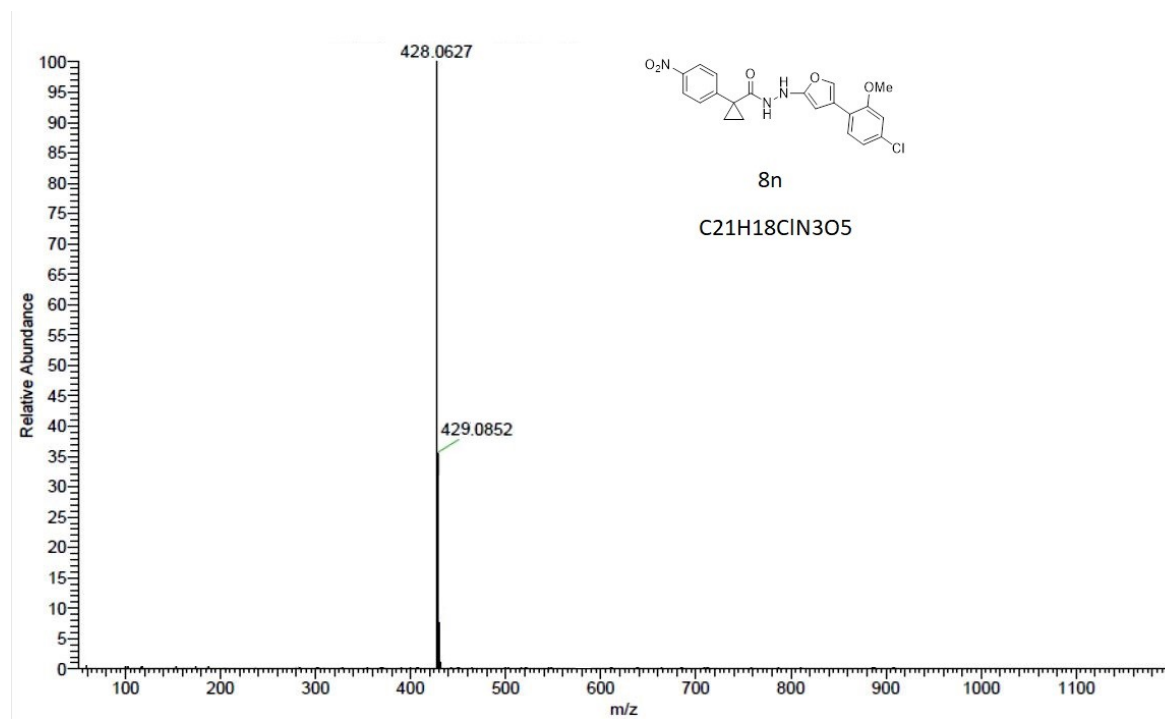

Figure S56. HRMS spectrum of **8n**

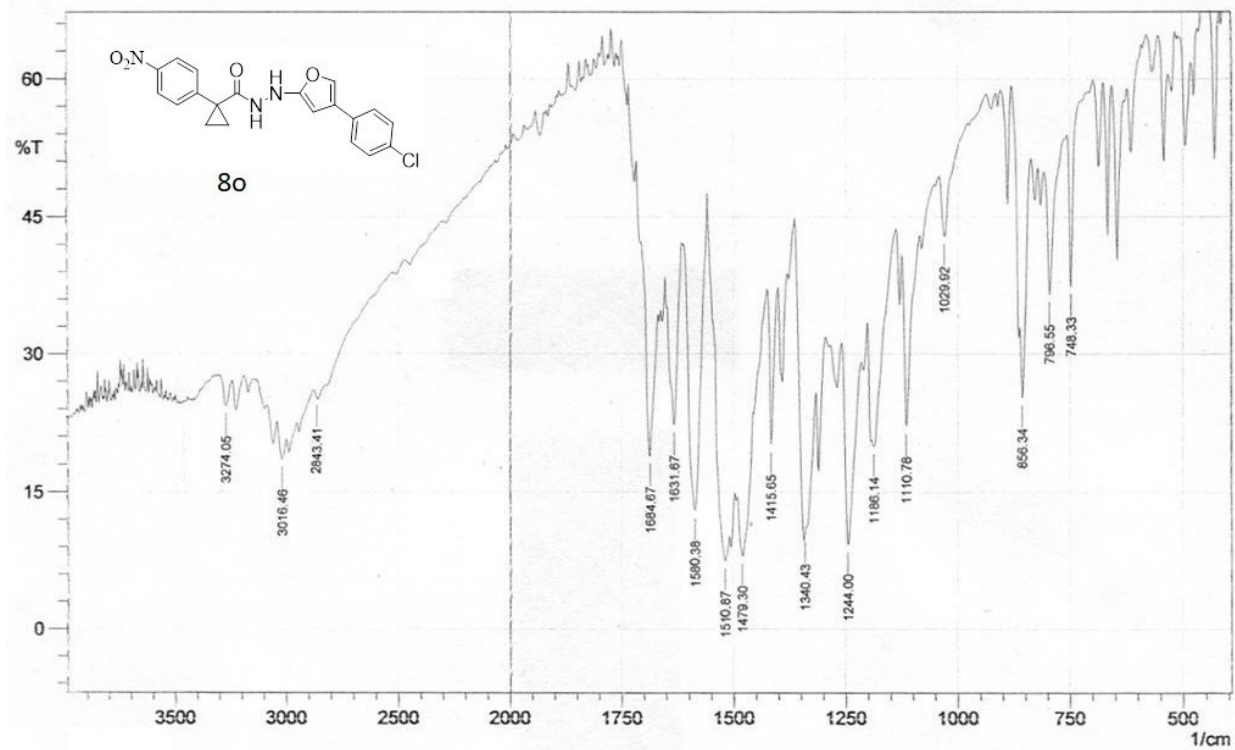

Figure S57. IR spectrum of **80**

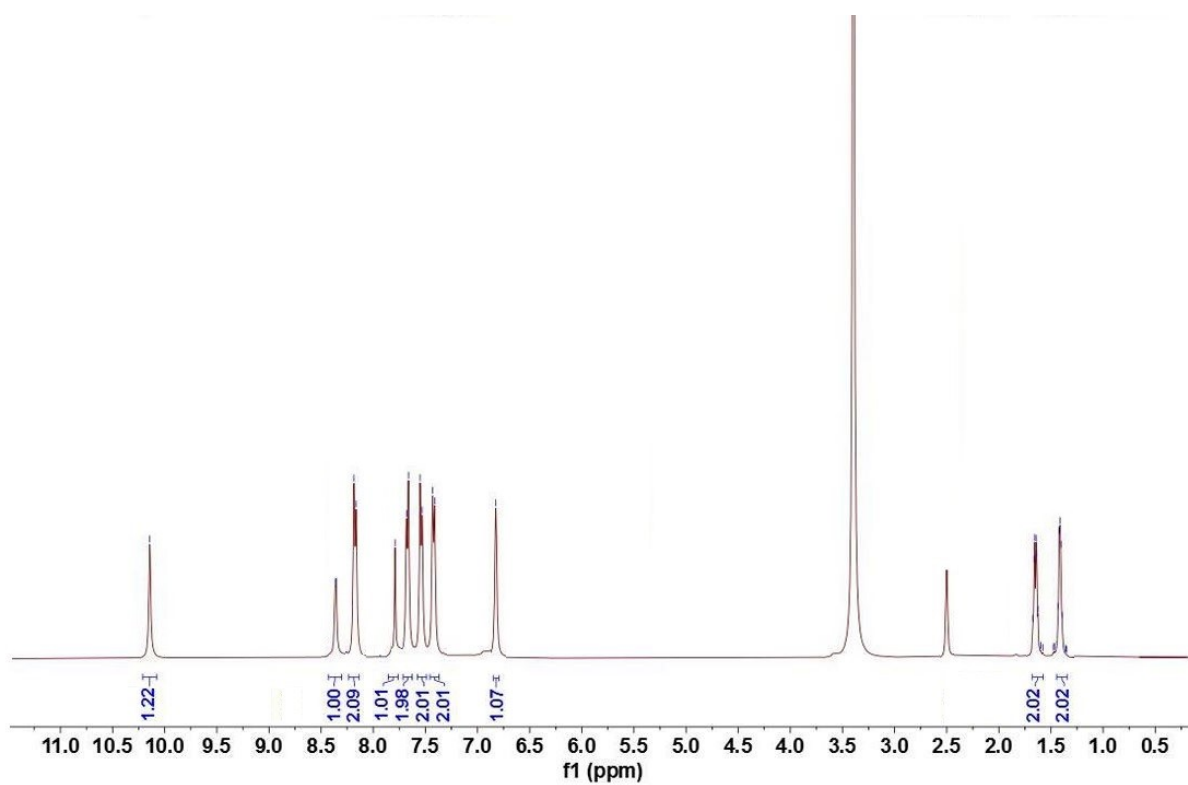

Figure S58. <sup>1</sup>H NMR spectrum of **80**

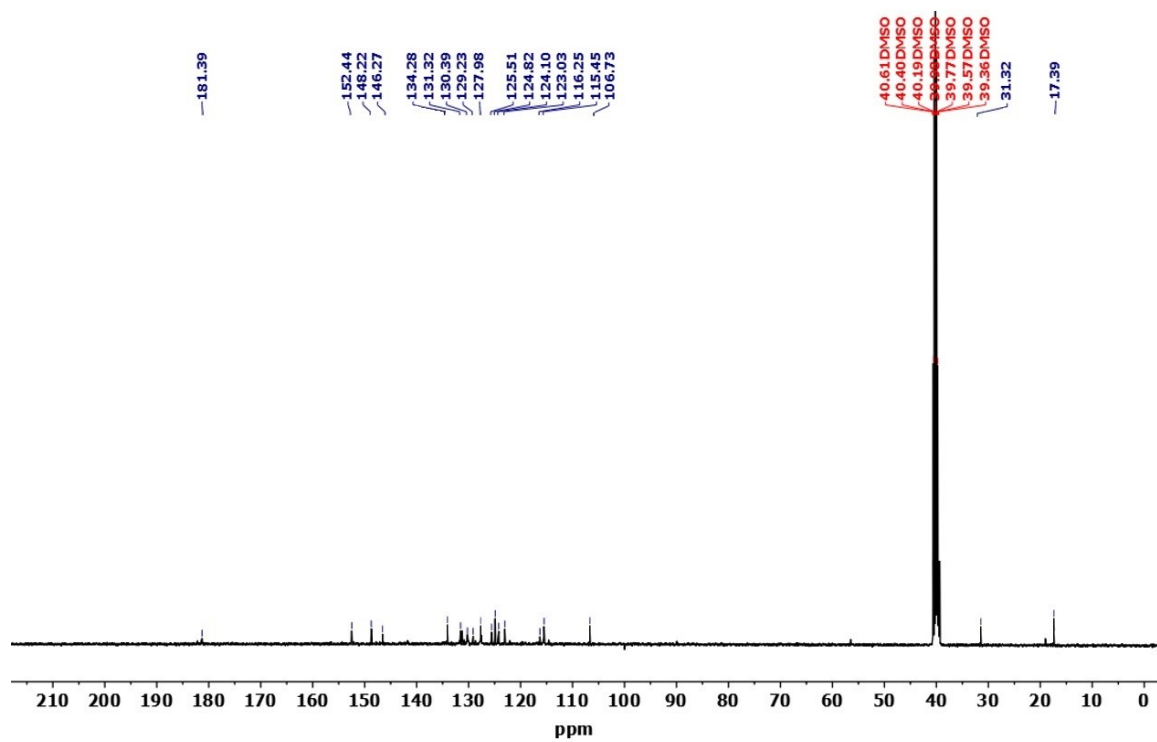

Figur

e S59. <sup>13</sup>C NMR spectrum of 8o

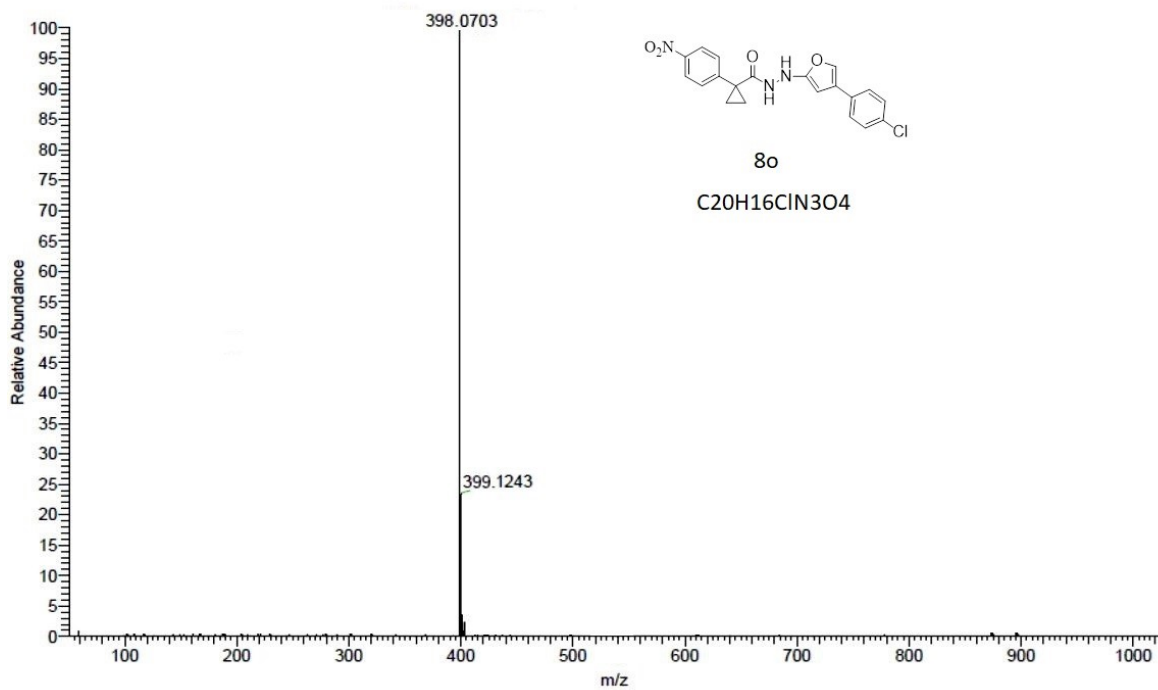

Figure S60. HRMS spectrum of 8o
